# 1 **Age-dependent topic modelling of comorbidities in UK Biobank identifies** 2 **disease subtypes with differential genetic risk**

3

4 Xilin Jiang<sup>1,2,3,4,5,6</sup>, Martin Jinye Zhang<sup>4,7§</sup>, Yidong Zhang<sup>1,8,9§</sup>, Michael Inouye<sup>5,6,10,11,12,13</sup>, Chris  
5 Holmes<sup>1,2,14</sup>, Alkes L. Price<sup>4,7,15\*</sup>, Gil McVean<sup>1\*</sup>

6

## 7 **Affiliations**

8 <sup>1</sup> Big Data Institute, Li Ka Shing Centre for Health Information and Discovery, University of  
9 Oxford, Oxford OX3 7LF, UK

10 <sup>2</sup> Department of Statistics, University of Oxford, Oxford OX1 3LB, UK

11 <sup>3</sup> Wellcome Centre for Human Genetics, University of Oxford, Oxford OX3 7BN, UK

12 <sup>4</sup> Department of Epidemiology, Harvard T.H. Chan School of Public Health, Boston, MA, USA

13 <sup>5</sup> British Heart Foundation Cardiovascular Epidemiology Unit, Department of Public Health and  
14 Primary Care, University of Cambridge, Cambridge UK

15 <sup>6</sup> Heart and Lung Research Institute, University of Cambridge, Cambridge UK

16 <sup>7</sup> Program in Medical and Population Genetics, Broad Institute of MIT and Harvard, Cambridge,  
17 MA, USA

18 <sup>8</sup> CAMS China Oxford Institute, Nuffield Department of Medicine, University of Oxford,  
19 Oxford OX3 7BN, UK

20 <sup>9</sup> Department of Radiation Oncology, Peking Union Medical College Hospital, Chinese  
21 Academy of Medical Sciences and Peking Union Medical College, Beijing, China

22 <sup>10</sup> Cambridge Baker Systems Genomics Initiative, Department of Public Health and Primary  
23 Care, University of Cambridge, Cambridge, UK.

24 <sup>11</sup> Health Data Research UK Cambridge, Wellcome Genome Campus and University of  
25 Cambridge, Cambridge, UK.

26 <sup>12</sup> British Heart Foundation Cambridge Centre of Research Excellence, Department of Clinical  
27 Medicine, University of Cambridge, Cambridge, UK.

28 <sup>13</sup> Cambridge Baker Systems Genomics Initiative, Baker Heart and Diabetes Institute,  
29 Melbourne, VIC, Australia.

30 <sup>14</sup> The Alan Turing Institute, London NW1 2DB, UK

31 <sup>15</sup> Department of Biostatistics, Harvard T.H. Chan School of Public Health, Boston, MA, USA

32

33 § These authors contributed equally to this work

34 \*These authors jointly supervised the work

35 Corresponding authors:

36 [xilinjiang@hsph.harvard.edu](mailto:xilinjiang@hsph.harvard.edu)

37 [aprice@hsph.harvard.edu](mailto:aprice@hsph.harvard.edu)

38 [gil.mcvean@bdi.ox.ac.uk](mailto:gil.mcvean@bdi.ox.ac.uk)

39

40

41 **Abstract**

42 Longitudinal data from electronic health records (EHR) has immense potential to improve  
43 clinical diagnoses and personalised medicine, motivating efforts to identify disease subtypes  
44 from age-dependent patient comorbidity information. We introduce an age-dependent topic  
45 modelling (ATM) method that provides a low-rank representation of longitudinal records of  
46 hundreds of distinct diseases in large EHR data sets. The model learns, and assigns to each  
47 individual, topic weights for several disease topics, each of which reflects a set of diseases that  
48 tend to co-occur as a function of age. Simulations show that ATM attains high accuracy in  
49 distinguishing distinct age-dependent comorbidity profiles. We applied ATM to 282,957 UK  
50 Biobank samples, analysing 1,726,144 disease diagnoses spanning 348 diseases with  $\geq 1,000$   
51 incidences. We inferred 10 disease topics optimising model fit. We identified 52 diseases with  
52 heterogeneous comorbidity profiles ( $\geq 500$  incidences assigned to each of  $\geq 2$  topics), including  
53 breast cancer, type 2 diabetes (T2D), hypertension, and hypercholesterolemia; for most of these  
54 diseases, topic assignments were highly age-dependent, suggesting differences in disease  
55 aetiology for early-onset vs. late-onset disease. We defined subtypes of the 52 heterogeneous  
56 diseases based on the topic assignments, and compared genetic risk across subtypes using  
57 polygenic risk scores (PRS). We identified 18 disease subtypes whose PRS differed significantly  
58 from other subtypes of the same disease, including a subtype of T2D characterised by  
59 cardiovascular comorbidities and a subtype of asthma characterised by dermatological  
60 comorbidities. We further identified specific SNPs underlying these differences. For example,  
61 the T2D-associated SNP rs1063192 in the *CDKN2B* locus has a higher odds ratio in the top  
62 quartile of cardiovascular topic weight ( $1.19 \pm 0.02$ ) than in the bottom quartile ( $1.08 \pm 0.02$ )  
63 ( $P = 4 \times 10^{-5}$  for difference). In conclusion, ATM identifies disease subtypes with differential  
64 genome-wide and locus-specific genetic risk profiles.

65  
66  
67  
68  
69  
70

## 71 **Introduction**

72 Longitudinal electronic health record (EHR) data, encompassing diagnoses across hundreds of  
73 distinct diseases, offers immense potential to improve clinical diagnoses and personalised  
74 medicine<sup>1</sup>. Despite intense interest in both the genetic relationships between distinct diseases<sup>2–11</sup>  
75 and the genetic relationships between biological subtypes of disease<sup>12–15</sup>, there has been limited  
76 progress on classifying disease phenotypes into groups of diseases with frequent co-occurrences  
77 (comorbidities) and leveraging comorbidities to identify disease subtypes. Low-rank modelling  
78 has appealing theoretical properties<sup>16,17</sup> and has produced promising applications<sup>18–24</sup> to infer  
79 meaningful representations of high-dimensional data. In particular, low-rank representation is an  
80 appealing way to summarise data across hundreds of distinct diseases<sup>25–27</sup>, providing the  
81 potential to identify patient-level comorbidity patterns and distinguish disease subtypes. Disease  
82 subtypes inferred from EHR data could be validated by comparing genetic profiles across  
83 subtypes, which is possible with emerging data sets that link genetic data with EHR data<sup>28–31</sup>.

84  
85 Previous studies have used low-rank representation to identify shared genetic components<sup>25–27</sup>  
86 across multiple distinct diseases, identifying relationships between diseases and generating  
87 valuable biological insights. However, age at diagnosis information in longitudinal EHR data has  
88 the potential to improve such efforts. For example, a recent study used longitudinal disease  
89 trajectories to identify disease pairs with statistically significant directionality<sup>32</sup>, suggesting that  
90 age information could be leveraged to infer comorbidity profiles that capture temporal  
91 information. In addition, patient-level comorbidity information could potentially be leveraged to  
92 identify biological subtypes of disease, complementing its application to increase power for  
93 identifying genetic associations<sup>12</sup> and to cluster disease-associated variants into biological  
94 pathways<sup>8</sup>; disease subtypes are fundamental to disease aetiology<sup>14,33–36</sup>.

95  
96 Here, we propose an age-dependent topic modelling (ATM) method to provide a low-rank  
97 representation of longitudinal disease records. ATM learns, and assigns to each individual, topic  
98 weights for several disease topics, each of which reflects a set of diseases that tend to co-occur as  
99 a function of age. We applied ATM to 1.7 million disease diagnoses spanning 348 diseases in the  
100 UK Biobank, inferring 10 disease topics. We identified 52 diseases with heterogeneous  
101 comorbidity profiles that enabled us to define disease subtypes. We used genetic data to validate  
102 the disease subtypes, showing that they exhibit differential genome-wide and locus-specific  
103 genetic risk profiles.

104

105

## 106 **Results**

### 107 *Overview of methods*

108 We propose an age-dependent topic modelling (ATM) model, providing a low-rank  
109 representation of longitudinal records of hundreds of distinct diseases in large EHR data sets  
110 (Figure 1, Methods). The model assigns to each individual *topic weights* for several *disease*  
111 *topics*; each disease topic reflects a set of diseases that tend to co-occur as a function of age,  
112 quantified by age-dependent *topic loadings* for each disease. The model assumes that for each  
113 disease diagnosis, a topic is sampled based on the individual's topic weights (which sum to 1  
114 across topics, for a given individual), and a disease is sampled based on the individual's age and  
115 the age-dependent topic loadings (which sum to 1 across diseases, for a given topic at a given  
116 age). The model generalises the latent dirichlet allocation (LDA) model<sup>37,38</sup> by allowing topic  
117 loadings for each topic to vary with age (Supplementary Note, Supplementary Figure 1).

118

119 We developed a method to fit this model that addresses several challenges inherent to large EHR  
120 data sets; the method estimates topic weights for each individual, topic loadings for each disease,  
121 and posterior diagnosis-specific topic probabilities for each disease diagnosis. First, we derived a  
122 scalable deterministic method that uses numerical approximation approaches to fit the  
123 parameters of the model, addressing the challenge of computational cost. Second, we used the  
124 prediction odds ratio<sup>39</sup> to compare model structures (e.g. number of topics and parametric form  
125 of topic loadings as a function of age), addressing the challenge of appropriate model selection;  
126 roughly, the prediction odds ratio quantifies the accuracy of correctly predicting disease  
127 diagnoses in held-out patients using comorbidity information, compared to a predictor based  
128 only on prevalence (see Methods and Supplementary Table 1). Third, we employed collapsed  
129 variational inference<sup>40</sup>, addressing the challenge of sparsity in the data (e.g. in UK Biobank data  
130 that we analysed, the average patient has diagnoses for 6 of 348 diseases analysed); collapsed  
131 variational inference outperformed mean-field variational inference<sup>37</sup> in empirical data. Further  
132 details are provided in the Methods section and Supplementary Note; we have publicly released  
133 open-source software implementing the method (see Code Availability).

134

135 We applied ATM to longitudinal records of 282,957 individuals from the UK Biobank<sup>29</sup>,  
136 containing a total of 1,726,144 disease diagnoses spanning 348 diseases (see Data Availability).  
137 Each disease diagnosis had an associated age at diagnosis, defined as the earliest age of reported  
138 diagnosis of the disease in that individual; we caution that age at diagnosis may differ from age  
139 at disease onset (see Discussion). ATM does not use genetic data, but we used genetic data to  
140 validate the inferred topics (Methods).

141

### 142 *Simulations*

143 We performed simulations to compare ATM with latent dirichlet allocation (LDA)<sup>37,38</sup>, a simpler  
144 topic modelling approach that does not model age. We simulated 61,000 disease diagnoses  
145 spanning 20 diseases in 10,000 individuals, using the ATM generative model; the average

146 number of disease diagnoses per individual (6.1), ratio of #individuals/#diseases (500), topic  
147 loadings, and standard deviation in age at diagnosis (8.5 years for each disease) were chosen to  
148 match empirical UK Biobank data. We assigned each disease diagnosis to one of two subtypes  
149 for the underlying disease based on age and other subtype differences, considering high,  
150 medium, or low age-dependent effects by specifying an average difference of 20, 10, or 5 years  
151 respectively in age at diagnosis for the two subtypes. For each level of age-dependent effects,  
152 we varied the proportion of diagnoses belonging to the first subtype (*subtype sample size*  
153 *proportion*) from 10-50%. Further details of the simulation framework are provided in the  
154 Methods section. Our primary metric for evaluating the LDA and ATM methods was area under  
155 the precision-recall curve (AUPRC)<sup>41</sup>, where precision is defined as the proportion of disease  
156 diagnoses that a given method assigned to the first subtype that were assigned correctly and  
157 recall is defined as the proportion of disease diagnoses truly belonging to the first subtype that  
158 were assigned correctly. We discretized the subtype assigned to each disease diagnosis by a  
159 given method by assigning the subtype with higher inferred probability. We note that AUPRC is  
160 larger when classifying the smaller subtype; results using the second subtype as the classification  
161 target are also provided. We used AUPRC (instead of prediction odds ratio) in our simulations  
162 because the underlying truth is known. Further details and justifications of metrics used in this  
163 study are provided in the Methods section and Supplementary Table 1.

164  
165 In simulations with high age-dependent effects, ATM attained much higher AUPRC than LDA  
166 across all values of subtype sample size proportion (AUPRC difference: 24%-42%), with both  
167 methods performing better at more balanced ratios (Figure 2, Supplementary Table 2).  
168 Accordingly, ATM attained both higher precision and higher recall than LDA (Supplementary  
169 Figure 2). Results were qualitatively similar when using the second subtype as the classification  
170 target (Supplementary Figure 3). In simulations with medium or low age-dependent effects,  
171 ATM continued to outperform LDA but with smaller differences between the methods. In  
172 simulations without age-dependent effects, ATM slightly underperformed LDA (Supplementary  
173 Figure 4A).

174  
175 We performed three secondary analyses. First, we varied the number of individuals, number of  
176 diseases, or number of disease diagnoses per individual. ATM continued to outperform LDA in  
177 each case, although increasing the number of individuals or the number of disease diagnoses per  
178 individual did not always increase AUPRC (Supplementary Figure 4B). Second, we performed  
179 simulations in which we increased the number of subtypes from two to five and changed the  
180 number of diseases to 50, and compared ATM models trained using different numbers of topics  
181 (in 80% training data) by computing the prediction odds ratio; we used the prediction odds ratio  
182 (instead of AUPRC) in this analysis both because it is a better metric to evaluate the overall  
183 model fit to the data, and because it is unclear how to compare AUPRC across scenarios of  
184 varying topic numbers (see Supplementary Table 1). We confirmed that the prediction odds  
185 ratio was maximised using five topics, validating the use of the prediction odds ratio for model

186 selection (Supplementary Figure 5A). Third, we computed the accuracy of inferred topic  
187 loadings, topic weights, and grouping accuracy (defined as proportion of pairs of diseases truly  
188 belonging to the same topic that ATM correctly assigned to the same topic), varying the number  
189 of individuals and number of diseases diagnoses per individual. We determined that ATM also  
190 performed well under these metrics (Supplementary Figure 5B-E).

191  
192 We conclude that ATM (which models age) assigns disease diagnoses to subtypes with higher  
193 accuracy than LDA (which does not model age) in simulations with age-dependent effects. We  
194 caution that our simulations largely represent a best-case scenario for ATM given that the  
195 generative model and inference model are very similar (although there are some differences, e.g.  
196 topic loadings were generated using a model different from the inference model), thus it is important  
197 to analyse empirical data to validate the method.

198

199 *Age-dependent disease topic loadings capture comorbidity profiles in the UK Biobank*

200 We applied ATM to longitudinal records of 282,957 individuals from the UK Biobank<sup>29</sup>. We  
201 used Phecode<sup>42</sup> to define 1,726,144 disease diagnoses spanning 348 diseases with at least 1,000  
202 diagnoses each; the average individual had 6.1 disease diagnoses, and the average disease had a  
203 standard deviation of 8.5 years in age at diagnosis. The optimal ATM model structure included  
204 10 topics and modelled age-dependent topic loadings for each disease as a spline function with  
205 one knot (see below). We assigned names (and corresponding acronyms) to each of the 10  
206 inferred topics based on the Phecode systems<sup>42</sup> assigned to diseases with high topic loadings  
207 (aggregated across ages) for that topic (Table 1, Supplementary Table 3).

208

209 Age-dependent topic loadings across all 10 topics and 348 diseases (stratified into Phecode  
210 systems), summarised as averages across age<60 and age≥60, are reported in Figure 3,  
211 Supplementary Figure 6, and Supplementary Table 4. Some topics such as NRI span diseases  
212 across the majority of Phecode systems, while other topics such as ARP are concentrated in a  
213 single Phecode system. Conversely, a single Phecode system may be split across multiple topics,  
214 e.g. the digestive system is split across UGI, LGI, and MDS. We note that topic loadings in  
215 diseases that span multiple topics are heavily age-dependent. For example, type 2 diabetes  
216 patients assigned to the CVD topic are associated with early onset of type 2 diabetes whereas  
217 type 2 diabetes patients assigned to MGND topic are associated with late onset of type 2  
218 diabetes.

219

220 We performed seven secondary analyses to validate the inferred comorbidity topics. First, we fit  
221 ATM models with different model structures using 80% training data, and computed their  
222 prediction odds ratios using 20% testing data. The ATM model structure with 10 topics and age-  
223 dependent topic loadings modelled as a spline function performed optimally (Supplementary  
224 Figure 7; see Methods). Second, we confirmed that ATM attained higher prediction odds ratios  
225 than LDA across different values of the number of topics (Supplementary Figure 8). Third, we

226 reached similar conclusions using evidence lower bounds<sup>39</sup> (ELBO; see Supplementary Table 1)  
227 when fitting the model without splitting training and testing data (Supplementary Figure 9).  
228 Fourth, we confirmed that collapsed variational inference<sup>40</sup> outperformed mean-field variational  
229 inference<sup>37</sup> (Supplementary Figure 10). Fifth, we computed a co-occurrence odds ratio  
230 evaluating whether diseases grouped into the same topic by ATM in the training data have higher  
231 than random probability of co-occurring in the testing data (Supplementary Table 1). The co-  
232 occurrence odds ratio is consistently above one and increases with the number of comorbid  
233 diseases, for each inferred topic (Supplementary Figure 11). Sixth, we compared the topic  
234 loadings by repeating the inference on female-only or male-only populations and observed no  
235 major discrepancies, except for genitourinary topics MGND and FGND (topic loading  $R^2$   
236 (female vs. all) = 0.788, topic loading  $R^2$  (male vs. all) = 0.773, Supplementary Figure 12).  
237 Lastly, we verified that BMI, sex, Townsend deprivation index, and birth year explained very  
238 little of the information in the inferred topics (Supplementary Table 3).

239  
240 Disease topics capture known biology as well as the age-dependency of comorbidities for the  
241 same diseases. For example, early onset of essential hypertension is associated with the CVD  
242 topic<sup>43</sup>, which captures the established connection between lipid dysfunction  
243 (“hypercholesterolemia”) and cardiovascular diseases<sup>44</sup>, while later onset of essential  
244 hypertension is associated with the CER topic, which pertains to type 2 diabetes, obesity and  
245 COPD (Figure 4A). Continuously varying age-dependent topic loadings for all 10 topics,  
246 restricted to diseases with high topic loadings, are reported in Supplementary Figure 13 and  
247 Supplementary Table 5. We note that most diseases have their topic loadings concentrated into a  
248 single topic (Figure 4B, Supplementary Figure 14A and Supplementary Table 4), and that most  
249 individuals have their topic weights concentrated into 1-2 topics (Figure 4C and Supplementary  
250 Figure 14B). For diseases spanning multiple topics (Supplementary Figure 6 and Supplementary  
251 Table 4), the assignment of type 2 diabetes patients to the CVD topic is consistent with known  
252 pathophysiology and epidemiology<sup>45,46</sup> and has been shown in other comorbidity clustering  
253 studies, e.g. with the Beta Cell and Lipodystrophy subtypes described in ref.<sup>35</sup> and the severe  
254 insulin-deficient diabetes (SIDD) subtype described in ref.<sup>14</sup>, which are characterised by early  
255 onset of type 2 diabetes and have multiple morbidities including hypercholesterolemia,  
256 hyperlipidemia, and cardiovascular diseases<sup>47</sup>. In addition, early-onset breast cancer and late-  
257 onset breast cancer are associated with different topics, e.g. NRI and FGND, consistent with  
258 known treatment effects for breast cancer patients which increase susceptibility to infections,  
259 especially bacterial pneumonias<sup>48</sup> and hypothyroidism<sup>49</sup>

260  
261 We conclude that ATM identifies latent disease topics that robustly compress age-dependent  
262 comorbidity profiles and capture disease comorbidities both within and across Phecode systems.

263  
264

265 *Disease subtypes defined by distinct topics are genetically heterogeneous*

266 We sought to define disease subtypes based on the diagnosis-specific topic probabilities of each  
267 disease diagnosis. We assigned a discrete topic assignment to each disease diagnosis based on its  
268 maximum diagnosis-specific topic probability, and defined the disease subtype of each disease  
269 diagnosis based on the topic assignment. We restricted our disease subtype analyses to 52  
270 diseases with at least 500 diagnoses assigned to each of two distinct subtypes (Methods,  
271 Supplementary Figure 6, Supplementary Figure 15, and Supplementary Table 6).

272  
273 Age-dependent distributions of subtypes (topics) for four diseases (type 2 diabetes, asthma,  
274 hypercholesterolemia, and essential hypertension) are reported in Figure 5A and Supplementary  
275 Table 7; results for all 52 diseases are reported in Supplementary Figure 16 and Supplementary  
276 Table 7. The number of subtypes can be large, e.g. six subtypes for essential hypertension.  
277 Subtypes are often age-dependent, e.g. for the CVD and MGND subtypes of type 2 diabetes<sup>14,35</sup>  
278 (discussed above).

279  
280 ATM and the resulting subtype assignments do not make use of genetic data. However, we used  
281 genetic data to assess genetic heterogeneity across inferred subtypes of each disease. We first  
282 assessed whether polygenic risk scores (PRS) for overall disease risk varied across subtypes of  
283 each disease; PRS were computed using BOLT-LMM with five-fold cross validation<sup>50,51</sup> (see  
284 Methods and Code Availability). Results for four diseases (from Figure 5A) are reported in  
285 Figure 5B and Supplementary Table 8; results for all 10 well-powered diseases (10 of 52  
286 diseases with highest z-scores for nonzero SNP-heritability) are reported in Supplementary  
287 Figure 17 and Supplementary Table 8. We identified 18 disease-topic pairs (of 100 disease-topic  
288 pairs analysed) for which PRS values in disease cases vary with patient topic weight. For  
289 example, for essential hypertension, hypercholesterolemia, and type 2 diabetes, patients assigned  
290 to the CVD subtype had significantly higher PRS values than patients assigned to other subtypes.  
291 For essential hypertension, patients assigned to the CER subtype had significantly higher PRS  
292 values; for type 2 diabetes, patients assigned to the CER subtype had lower PRS values than the  
293 CVD subtype, even though the majority of type 2 diabetes diagnoses are assigned to the CER  
294 subtype. We further verified that most of the variation in PRS values with disease subtype could  
295 not be explained by age<sup>52</sup> or differences in subtype sample size (Supplementary Figure 18).  
296 These associations between subtypes (defined using comorbidity data) and PRS (defined using  
297 genetic data) imply that disease subtypes identified through comorbidity are genetically  
298 heterogeneous, consistent with differences in disease aetiology.

299  
300 We further investigated whether subtype assignments (defined using comorbidity data) revealed  
301 subtype-specific excess genetic correlations. We estimated excess genetic correlations between  
302 pairs of disease subtypes (relative to genetic correlations between the underlying diseases).  
303 Excess genetic correlations for 15 disease subtypes (spanning 11 diseases and 3 topics: CER,  
304 MGND and CVD) are reported in Figure 6A and Supplementary Table 9 (relative to genetic  
305 correlations between the underlying diseases; Figure 6B), and excess genetic correlations for all



306 89 well-powered disease subtypes (89 of 378 disease subtypes with z-score > 4 for nonzero SNP-  
307 heritability) are reported in Supplementary Figure 19 and Supplementary Table 9. Genetic  
308 correlations between pairs of subtypes involving the same disease were significantly less than 1  
309 (FDR<0.1) for hypertension (CER vs. CVD:  $\rho = 0.86 \pm 0.04$ ,  $P=0.0004$ ; MGND vs. CVD:  $\rho =$   
310  $0.74 \pm 0.05$ ,  $P=3 \times 10^{-8}$ ) and type 2 diabetes (CER vs. MGND:  $\rho = 0.64 \pm 0.09$ ,  $P=8 \times 10^{-5}$ )  
311 (Figure 6A; Supplementary Table 9). In addition, we observed significant excess genetic  
312 correlations (FDR<0.1) for 8 pairs of disease subtypes involving different diseases (Figure 6A;  
313 Supplementary Table 9). We verified that the excess genetic correlations could not be explained  
314 by non-disease-specific differences in the underlying topics (which are weakly heritable;  
315 Supplementary Table 3) by repeating the analysis using disease cases and controls with matched  
316 topic weights (Methods, Supplementary Figure 20). We also estimated subtype-specific SNP-  
317 heritability and identified some instances of differences between subtypes, albeit with limited  
318 power (Supp Table 10).

319  
320 Finally, we used the population genetic parameter  $F_{ST}^{53,54}$  to quantify genome-wide differences  
321 in allele frequency between two subtypes of the same disease; we used  $F_{ST}$  on control sets with  
322 matched topic weights to assess statistical significance while accounting for non-disease-specific  
323 differences in the underlying topics (excess  $F_{ST}$ ; Methods). We determined that 63 of 104 pairs  
324 of disease subtypes involving the same disease (spanning 29 of 49 diseases, excluding 3 diseases  
325 that did not have enough controls with matched topic weights) had significant excess  $F_{ST}$   
326 estimates (FDR < 0.1) (Supplementary Figure 21, Supplementary Table 11). For example, the  
327 CVD, CER, and MGND subtypes of type 2 diabetes had significant excess  $F_{ST}$  estimates ( $F$ -  
328 statistic=0.0003,  $P=0.001$  based on 1,000 matched control sets). This provides further evidence  
329 that disease subtypes as determined by comorbidity have different molecular and physiological  
330 aetiologies.

331  
332 We conclude that disease subtypes defined by distinct topics are genetically heterogeneous.

333  
334 *Disease-associated SNPs have subtype-dependent effects*  
335 We hypothesised that disease genes and pathways might differentially impact the disease  
336 subtypes identified by ATM. We investigated the genetic heterogeneity between disease  
337 subtypes at the level of individual disease-associated variants. We employed a statistical test that  
338 tests for SNP x topic interaction effects on disease phenotype in the presence of separate SNP  
339 and topic effects (Methods). We verified via simulations that this statistical test is well-calibrated  
340 under a broad range of scenarios with no true interaction, including direct effect of topic on  
341 disease, direct effect of disease on topic, pleiotropic SNP effects on disease and topic, and  
342 nonlinear effects (Supplementary Figure 22). We also assessed the power to detect true  
343 interactions (Supplementary Figure 23). To limit the number of hypotheses tested, we applied  
344 this test to independent SNPs with genome-wide significant main effects on disease (Methods).  
345 We thus performed 2,530 statistical tests spanning 888 disease-associated SNPs, 14 diseases, and  
346 35 disease subtypes (Supplementary Table 12). We assessed statistical significance using global

347 FDR<0.1 across the 2,530 statistical tests. We also computed main SNP effects specific to each  
348 quartile of topic weights across individuals, as an alternative way to represent SNP x topic  
349 interactions.

350

351 We identified 43 SNP x topic interactions at FDR<0.1 (Figure 7, Supplementary Figure 24,  
352 Supplementary Table 13 and Supplementary Table 14). Here, we highlight a series of examples.  
353 First, the type 2 diabetes-associated SNP rs1063192 in the *CDKN2B* locus has a higher odds  
354 ratio in the top quartile of CVD topic weight ( $1.19 \pm 0.02$ ) than in the bottom quartile ( $1.08 \pm 0.02$ )  
355 ( $P = 4 \times 10^{-4}$  for difference). *CDKN2B* is associated with both coronary artery disease and type 2  
356 diabetes<sup>55-59</sup>, suggesting that shared pathways underlie the observed SNP x topic interaction.  
357 Second, the asthma-associated SNP rs1837253 in the *TSLP* locus has a higher odds ratio in the  
358 top quartile of SRD topic weight ( $1.17 \pm 0.02$ ) than in the bottom quartile ( $1.05 \pm 0.02$ )  
359 ( $P = 1 \times 10^{-4}$  for difference). *TSLP* plays an important role in promoting Th2 cellular responses  
360 and is considered a potential therapeutic target, which is consistent with assignment of asthma  
361 and atopic/contact dermatitis<sup>60</sup> to the SRD topic (Supplementary Table 4). Third, the  
362 hypertension-associated SNP rs3735533 within the *HOTTIP* long non-coding RNA has a lower  
363 odds ratio in the top quartile of CVD topic weight ( $1.07 \pm 0.02$ ) than in the bottom quartile  
364 ( $1.13 \pm 0.02$ ). *HOTTIP* is associated with blood pressure<sup>27,61</sup> and conotruncal heart  
365 malformations<sup>62</sup>. Fourth, the hypothyroidism-associated SNP rs9404989 in the *HCG26* long non-  
366 coding RNA has a higher odds ratio in the top quartile of FGND topic weight ( $1.90 \pm 0.24$ ) than in  
367 the bottom quartile ( $1.19 \pm 0.13$ ) ( $P = 3 \times 10^{-3}$  for difference). Hypothyroidism associations have  
368 been reported in the HLA region<sup>27</sup>, but not to our knowledge in relation to the *HCG26*. To verify  
369 correct calibration, we performed control SNP x topic interaction tests using the same 888  
370 disease-associated SNPs together with random topics that did not correspond to disease subtypes,  
371 and confirmed that these control tests were well-calibrated (Supplementary Figure 24B).

372

373 We conclude that genetic heterogeneity between disease subtypes can be detected at the level of  
374 individual disease-associated variants.

375

376

## 377 Discussion

378 We have introduced an age-dependent topic modelling (ATM) method to provide a low-rank  
379 representation of longitudinal disease records, leveraging age-dependent comorbidity profiles to  
380 identify and validate biological subtypes of disease. Our study builds on previous studies on  
381 topic modelling<sup>37,38,40,63</sup>, genetic subtype identification<sup>13–15</sup>, and low-rank modelling of multiple  
382 diseases to identify shared genetic components<sup>25–27</sup>. We highlight three specific contributions of  
383 our study. First, we incorporated age at diagnosis information into our low-rank representation,  
384 complementing the use of age information in other contexts<sup>32,52,64</sup>; we showed that age  
385 information is highly informative for our inferred comorbidity profiles in both simulated and  
386 empirical data, emphasising the importance of accounting for age in efforts to classify disease  
387 diagnoses. Second, we identified 52 diseases with heterogeneous comorbidity profiles that we  
388 used to define disease subtypes, many of which had not previously been identified  
389 (Supplementary Table 15). Third, we used genetic data (including PRS, genetic correlation and  
390  $F_{ST}$  analyses) to validate these disease subtypes, confirming that the inferred subtypes reflect true  
391 differences in disease aetiology.

392

393 We emphasise three downstream implications of our findings. First, it is of interest to perform  
394 disease subtype-specific GWAS on the disease subtypes that we have identified here, analogous  
395 to GWAS of previously identified disease subtypes<sup>13–15</sup>. Second, our findings motivate efforts to  
396 understand the functional biology underlying the disease subtypes that we identified; the recent  
397 availability of functional data that is linked to EHR is likely to aid this endeavor<sup>29,65</sup>. Third, it is  
398 of interest to apply ATM to identify age-dependent comorbidity profiles and disease subtypes in  
399 other EHR data sets<sup>30,31</sup>; establishing representations of disease topics that are transferable and  
400 robust across different healthcare systems and data sources represents a major future challenge.

401

402 Our findings reflect a growing understanding of the importance of context, such as age, sex,  
403 socioeconomic status and previous medical history, in genetic risk<sup>52,66,67</sup>. To maximise power  
404 and ensure accurate calibration, context information needs to be integrated into clinical risk  
405 prediction tools that combine genetic information (such as polygenic risk scores<sup>1,68</sup>) and non-  
406 genetic risk factors. Our work focuses on age, but motivates further investigation of other  
407 contexts. We note that aspects of context are themselves influenced by genetic risk factors, hence  
408 there is an open and important challenge in determining how best to combine medical history  
409 and/or causal biomarker measurements with genetic risk to predict future events<sup>69</sup>.

410

411 We note several limitations of our work. First, age at diagnosis information in EHR data may be  
412 an imperfect proxy for true age at onset, particularly for less severe diseases that may be detected  
413 as secondary diagnoses; although perfectly accurate age at onset information would be ideal, our  
414 study shows that that imperfect age at diagnosis information is sufficient to draw meaningful  
415 conclusions. Second, raw EHR data may be inaccurate and/or difficult to parse<sup>1</sup>; again, although  
416 perfectly accurate EHR data would be ideal, our study shows that imperfect EHR data is

417 sufficient to draw meaningful conclusions. Third, our ATM approach incurs substantial  
418 computational cost (Supplementary Table 16); however, analyses of biobank-scale data sets are  
419 computationally tractable, with our main analysis requiring only 4.7 hours of running time.  
420 Finally, we have applied ATM to a UK population of predominantly European ancestry; it is of  
421 interest to apply ATM to diverse populations<sup>30,31</sup>. Despite these limitations, ATM is a powerful  
422 approach for identifying age-dependent comorbidity profiles and disease subtypes.  
423

## 424 Acknowledgements

425  
426 This research has been conducted using the UK Biobank Resource; application number 12788.  
427

428 Funded by Wellcome (BST00080- H503.01 to XJ, 100956/Z/13/Z to GM, [https://](https://wellcome.org)  
429 [wellcome.org](https://wellcome.org)); the Li Ka Shing Foundation (to GM, <https://www.lksf.org>); NIH grants R01  
430 HG006399, R01 MH101244, and R37 MH107649 (to ALP); The Alan Turing Institute  
431 (<https://www.turing.ac.uk>), Health Data Research UK (<https://www.hdruk.ac.uk>), the Medical  
432 Research Council UK (<https://mrc.ukri.org>), the Engineering and Physical Sciences Research  
433 Council (EPSRC <https://epsrc.ukri.org>) through the Bayes4Health programme Grant  
434 EP/R018561/1, and AI for Science and Government UK Research and Innovation (UKRI,  
435 <https://www.turing.ac.uk/research/asg>) (to CH); BHF Chair award CH/12/2/29428 (to XJ). This  
436 work was supported by core funding from the: British Heart Foundation (RG/13/13/30194;  
437 RG/18/13/33946), BHF Cambridge Centre of Research Excellence (RE/13/6/30180) and NIHR  
438 Cambridge Biomedical Research Centre (BRC-1215-20014). The funders had no role in study  
439 design, data collection and analysis, decision to publish, or preparation of the manuscript.  
440

441 This work uses data provided by patients and collected by the NHS as part of their care and  
442 Support. Computation used the Oxford Biomedical Research Computing (BMRC) facility, a  
443 joint development between the Wellcome Centre for Human Genetics and the Big Data Institute  
444 supported by Health Data Research UK and the NIHR Oxford Biomedical Research Centre. The  
445 views expressed are those of the authors and not necessarily those of the NHS, the NIHR or the  
446 Department of Health. We thank Kushal Dey, Luke Kelly and Yunlong Jiao for the discussion.  
447

## 448 Data availability

449 UK Biobank data is publicly available at <https://www.ukbiobank.ac.uk/>.

## 451 Code availability

452 Open-source software implementing the ATM method is available at [https://github.com/Xilin-](https://github.com/Xilin-Jiang/ATM)  
453 [Jiang/ATM](https://github.com/Xilin-Jiang/ATM). BOLT-LMM is available at <https://alkesgroup.broadinstitute.org/BOLT-LMM/>.  
454 Heritability and genetic correlation analysis were performed using LDSC, which is available at

455 <https://github.com/bulik/ldsc>. PLINK v1.9, which was used for  $F_{ST}$  and association tests, is  
456 available at <https://www.cog-genomics.org/plink/>.

457

458

## 459 Methods

### 460 Age-dependent topic model (ATM)

461 Our Age-dependent topic model (ATM) is a Bayesian hierarchical model to infer latent risk  
462 profiles for common diseases. The model assumes that each individual possesses several age-  
463 evolving disease profiles (topic loadings), which summarise the risk over age for multiple  
464 diseases that tend to co-occur within an individual's lifetime, namely the age specific multi-  
465 morbidity profiles. At each disease diagnosis, one of the disease profiles is first chosen based on  
466 individual weights of profile composition (topic weights), the disease is then sampled from this  
467 profile conditional on the age of the incidence.

468

469 We constructed a Bayesian hierarchical model to infer  $K$  latent risk profiles for  $D$  distinct  
470 common diseases. Each latent risk profile (comorbidity topics) is age-evolving and contains risk  
471 trajectories for all  $D$  diseases considered. Each individual might have a different number of  
472 diseases, while the disease risk is determined by the weighted combination of latent risk topics.

473 The indices in this note are as follows:

- 474 •  $s = 1, \dots, M$ ;
- 475 •  $n = 1, \dots, N_s$ ;
- 476 •  $i = 1, \dots, K$ ;
- 477 •  $j = 1, \dots, D$ ;

478 where  $M$  is the number of subjects,  $N_s$  is the number of records within  $s^{th}$  subject,  $K$  is the  
479 number of topics, and  $D$  is the total number of diseases we are interested in. The plate notation of  
480 the generative model is summarised in Supplementary Figure 1:

- 481 •  $\theta \in R^{M \times K}$  is the topic weight for all individuals (referred to as patient topic weights),  
482 each row of which ( $\in R^K$ ) is assumed to be sampled from a Dirichlet distribution with  
483 parameter  $\alpha$ .  $\alpha$  is set as a hyper parameter:  $\theta_s \sim Dir(\alpha)$ .
- 484 •  $z \in \{1, 2, \dots, K\}^{\sum_s N_s}$  (referred to as diagnosis-specific topic probability) is the topic  
485 assignment for each diagnosis  $w \in \{1, 2, \dots, D\}^{\sum_s N_s}$ . Note the total number of  
486 diagnoses across all patients are  $\sum_s N_s$ . The topic assignment for each diagnosis is  
487 generated from a categorical distribution with parameters equal to  $s^{th}$  individual topic  
488 weight:  $z_{sn} \sim Multi(\theta_s)$ .
- 489 •  $\beta(t) \in F(t)^{K \times D}$  is the topic loading which is  $K \times D$  functions of age  $t$ .  $F(t)$  is the  
490 class of functions of  $t$ . At each plausible  $t$ , the following is satisfied:  $\sum_j \beta_{ij}(t) = 1$ . In  
491 practice we use softmax function to ensure above is true and add smoothness by constrain  
492  $F(t)$  to be spline or polynomial functions:  $\beta_{ij}(t) = \frac{\exp(p_{ij}^T \phi(t))}{\{\sum_{j=1}^D \exp(p_{ij}^T \phi(t))\}}$ , where  
493  $p_{ij} = \{p_{ijd}\}$ ;  $d = 1, 2, \dots, P$ ;  $P$  is the degree of freedom that controls the smoothness;  
494  $\phi(t)$  is polynomial and spline basis for age  $t$ .

- 495 •  $w \in \{1, 2, \dots, D\}^{\sum_s N_s}$  are observed diagnoses. The  $n^{th}$  diagnosis of  $s^{th}$  individual  $w_{sn}$   
496 is sampled from the topic  $\beta_{z_{sn}}(t)$  chosen by  $z_{sn}$ :  $w_{sn} \sim Multi(\beta_{z_{sn}}(t_{sn}))$ , here  $t_{sn}$  is the  
497 age of the observed age at diagnosis of the observed diagnosis  $w_{sn}$ .

498

499 The values of interest in this model are global topic parameter  $\beta$ , individual (patient) level topic  
500 weight  $\theta$ , and diagnosis-specific topic probability  $z$ . Based on the generative process above, we  
501 notice that each patient is independent conditional on  $\alpha$ . Therefore, the inference of  $\theta$  and  
502  $z$  (discussed below) could be performed by looping each individual in turn.

503

504 The key element in our model is age-evolving risk profiles, which is achieved by model the  
505 comorbidity trajectories  $\beta(t) \in F(t)^{K \times D}$  as functions of age. The functionals  $F(t)$  considered  
506 are linear, quadratic, cubic polynomials, and cubic splines with one, two and three knots.

507

### 508 Inference of ATM

509 The variables of interest are global topic parameter  $\beta(t)$ , individual (patient) level topic weight  
510  $\theta$ , and diagnosis-specific topic probability  $z$  of each diagnosis. We could adopt an EM strategy,  
511 where in the E-step we first estimate posterior distribution of  $\theta$  and  $z$ , then in the M-step we  
512 estimate  $\beta$  which maximises the evidence lower bound (ELBO).

513

514 The details of the inference is explained in Supplementary Note. In summary, in a Bayesian  
515 setting, the model could be evaluated by the evidence function  $p(w|\alpha, \beta)$ . The best  $\beta(t)$  is found  
516 by maximise the evidence function, while for  $\theta$  and  $z$  we aim to find or approximate their  
517 posterior distribution  $p(z, \theta | w, \alpha, \beta)$ . Given that the posterior distribution is intractable, we use  
518 variational distribution  $q(z, \theta)$  to approximate them. Now we could write the evidence function  
519 as:

$$520 \quad p(w | \alpha, \beta) = L(z, \theta, \beta, \alpha) + KL(q||p),$$

521 here  $KL(q||p) = - \int_{z, \theta} q(z, \theta) \ln \frac{p(z, \theta | w, \alpha, \beta)}{q(z, \theta)}$  is the KL divergence. Since KL divergence is

522 always positive,  $L(z, \theta, \beta, \alpha)$  is a lower bound of the evidence function:

$$523 \quad L(z, \theta, \beta, \alpha) = E_q \{ \ln p(w, z, \theta | \alpha, \beta) - \ln q(z, \theta) \}.$$

524

525 When finding the posterior of  $\theta$  and  $z$ , we want  $\ln q(z, \theta)$  to be as close to the posterior  
526  $p(z, \theta | w, \alpha, \beta)$  as possible. Since  $KL(q||p) = 0$  when  $q(z, \theta) = p(z, \theta | w, \alpha, \beta)$ , this could  
527 be achieved by minimising  $KL(q||p)$  or maximise  $L(z, \theta, \beta, \alpha)$ . The most commonly used form  
528 of  $q(z, \theta)$  assume the distribution is factorised, which might cause instability when signal-to-  
529 noise ratio is low<sup>70</sup>. Therefore, more accurate inference methods such as collapsed variational  
530 inference is considered<sup>40</sup>. Comparison of the evidence lower bound  $L(z, \theta, \beta, \alpha)$  shows collapsed  
531 variational inference is consistently more accurate than LDA (Supplementary Figure 8).

532 Therefore we choose the collapsed variational inference<sup>40</sup>. The collapsed variational inference is  
533 achieved by integrate out  $\theta$  from the likelihood function  $p(w, z, \theta | \alpha, \beta)$  and find the

534 approximated posterior distribution  $q(z)$ . For detailed derivation, the comparison between  
535 collapsed variational inference and mean-field variational inference, and update algorithms, see  
536 Supplementary Note.

537  
538 When finding the  $\beta(t)$  that maximises the evidence function, we again maximise  $L(z, \theta, \beta, \alpha)$ .  
539 Maximising  $L(z, \theta, \beta, \alpha)$  with respect to  $\beta(t)$  does not have an analytical solution due to its  
540 softmax structure. We use local variational methods and numeric optimisation to find the  
541 distribution of  $\beta(t)$ . Details are provided in Supplementary Note.

542  
543 We extract topic weights at patient-level and diagnosis-level from the posterior distribution  
544 inferred from the data. Our model has the desired property that each patient and patient-diagnosis  
545 are assigned to comorbidity topics. The model estimates the posterior distribution  $q(z)$ , which is  
546 a categorical distribution (Supplementary Note.) Several metrics related to topic assignments  
547 could be derived from the  $q(z)$ :

- 548 • Each patient-diagnosis (incident disease) has a diagnosis-specific topic probability, which  
549 is computed as  $E_q\{z_n\}$  .
- 550 • Each patient has a posterior topic assignment  $\theta_s$  , which is a dirichlet distribution  $\theta_s \sim$   
551  $Dir(\alpha + \sum_{n=1}^{N_S} E_q\{z_n\})$  . The topic weights of each patient is the mode of this  
552 Dirichlet distribution  $\frac{\sum_{n=1}^{N_S} E_q\{z_n\}}{\sum_{i=1}^K \sum_{n=1}^{N_S} E_q\{z_{ni}\}}$  (we used  $\alpha = 1$  ). The value is used as the patient  
553 low-rank representation of disease history, for analysis including PRS association with  
554 comorbidity within cases and G x Topic interaction analysis.
- 555 • The average topic assignments of disease  $j$  is the mean over all incidences  
556  $\overline{E_q\{z_{sn} \in \{w_{sn}=j\}\}}$ . This metric is used to measure which comorbidity topic a disease is  
557 associated with (Figure 4B), and it is equivalent to a weighted average of topic loadings  
558 (for the specific weighted average expression, see equation 5 of Supplementary Note). A  
559 disease assigned to multiple topics is considered to have comorbidity subtypes.
- 560 • A hard assignment of a patient-diagnosis to a subtype is based on the max value of the  
561 vector  $E_q\{z_n\}$  . The incident disease is assigned to topic  $argmax_i (E_q\{z_{ni}\})$  .

## 562 563 **Metrics for evaluating ATM**

564 ATM is evaluated for different purposes, which requires different metrics (Supplementary Table  
565 1). Here we list the details of the four metrics considered: *Prediction odds ratio*, *Evidence Lower*  
566 *Bound (ELBO)*, *AURPC*, and *Co-occurrence odds ratio*.

567  
568 *Prediction odds ratio*: To compare models of different topic numbers and configuration of age  
569 profiles, we compare the prediction odds ratio of each model. Briefly, prediction odds ratio is  
570 defined on 20% held-out test data as the odds that the true diseases are within the top 1%  
571 diseases predicted by ATM (trained on 80% of the training set and uses earlier diagnoses as



572 input), divided by the odds that the true diseases are within the top 1% of diseases ranked by  
573 prevalence.

574

575 Specifically, we separate UK Biobank patients into a training set (80%) and a testing set (20%).  
576 On the training set, we estimate the comorbidity topic loadings. On the testing set, we fix the  
577 topic loadings and infer the patient topic weights to predict the next disease in chronological  
578 order. The topic loadings are estimated using the  $n$  diseases and compute the risk rank of  
579 diseases at the age of the  $n+1$  disease. The odds ratio is computed by the odds of the  $n+1$  disease  
580 being in the top 1% of diseases versus being in the top 1% most prevalent diseases. We use the  
581 top 1% most prevalent diseases instead of randomly chosen diseases as it represents a naive  
582 prediction model that predicts disease based on prevalence. The patient topic weights  
583 computation is in section Inference of ATM and the risk is computed as the linear combination  
584 of topics using topic weights as coefficients. We also compute the prediction odds ratio using the  
585 LDA model. We repeat the procedure for 10 times for each model configuration.

586

587 We compared the prediction odds ratio for topic number between 5 to 20, with linear, quadratic  
588 polynomial, cubic polynomial, and splines with one, two and three knots. We also compare the  
589 ATM model with the LDA model of topic number between 5 to 20.

590

591 *Evidence Lower Bound (ELBO)*: ELBO evaluated the accuracy of the variational inference  
592 method on a specific data set. Mathematical expression of ELBO for ATM is presented in  
593 equation 9 in Supplementary Note. To find the best model that fit to the entire dataset, we  
594 evaluate the ELBO for models with topic numbers between 5 to 20, 25, 30, and 50 topics and age  
595 profiles configured by linear, quadratic polynomial, cubic polynomial, and splines with one, two  
596 and three knots. Each model is run for 10 times with random initialisations. We choose the  
597 model that has the highest ELBO after converging.

598

599 *AURPC*: To evaluate whether a model could capture the comorbidity subtypes in simulation  
600 analysis, we compute the precision, recall, and area under precision-recall curve (AUPRC) to  
601 correctly classify disease diagnosis to be from the topic that it is generated from. The topic of  
602 each diagnosis is determined by diagnosis-specific topic probability. Note we could only  
603 evaluate AUPRC in simulations where the truth is known.

604

605 *Co-occurrence odds ratio*: To verify that the comorbidity profiles that the model captured are  
606 capturing diseases that are more likely to present within the same individual, we estimate the  
607 odds ratio of the disease duo, trio, quartet, and quintet that are captured by the topic versus that  
608 of random combinations. We divide the population into an 80% training set and a 20% testing  
609 set. We trained the ATM model with five random initialisations and kept the inference with the  
610 highest ELBO. Each disease is assigned to a topic by the highest average topic assignments.  
611 (section Inference of ATM) We focus on the top 100 diseases ranked by prevalence to avoid the

612 combination being too rare to appear in the population. In the testing set, we computed the odds  
613 of individuals who have all diseases in the comorbidities versus the odds implied if all diseases  
614 are independent (computed as the product of disease prevalence). The odds ratio is computed for  
615 all combinations of duo, trio, quartet, and quintet that are assigned to the same topics. We  
616 perform the same analysis using PCA for comparison.

617  
618

### 619 **Simulations of ATM method.**

620 To test whether the algorithm could assign disease diagnosis to correct comorbidity profiles, we  
621 simulated disease from two disease topics within a population of 10,000, using following  
622 parameters:

- 623 •  $M = 10,000$ ;
- 624 •  $\overline{N_S} = 6.1$ ;
- 625 •  $N_S \sim \text{exp}\{\overline{N_S}\}$ ;
- 626 •  $D = 20$ ;
- 627 •  $K = 2$ ;

628 Here  $M$  is the number of individuals in the population,  $\overline{N_S}$  is the average number of diseases for  
629 each individual,  $D$  is the total number of diseases,  $K$  is the number of comorbidity topics. The  
630 distribution of disease number per-individual  $N_S$  is sampled from an exponential distribution,  
631 which matches those from UK Biobank data (Supplementary Figure 26). According to equation  
632 3.1 in Ghorbani et al.<sup>70</sup>, whether the topic model could capture the true latent structure is  
633 determined by the information signal-to-noise ratio and could be evaluated with limits  $M \rightarrow$   
634  $\infty$ ;  $D \rightarrow \infty$ ;  $\frac{D}{M} \rightarrow \delta$ , where  $\delta$  is a constant. Therefore we choose  $D$  and  $M$  at scales that make  $\frac{D}{M}$   
635 approximately similar to those of the UK Biobank dataset (Samples size = 282,957; distinct  
636 disease number = 349).

637

638 The simulated topics loadings are constructed as follows:

- 639 • All but  $K$  diseases are simulated to be associated with comorbidity profiles. Each of them  
640 has a risk period of 30 years and overlaps for 10 years with the next disease. For  
641 example, if disease 1 has a risk period from 30 to 59 years of age, disease 2 will have a  
642 risk period between 50 to 79 years of age. When the risk period reaches the maximal age,  
643 the truncated part will be carried to the next disease to create diseases with shorter risk  
644 period. All risk periods are assigned a value 1.
- 645 •  $K$  diseases that are not associated with comorbidity are simulated to span all topics. The  
646 values of these diseases are sampled from  $Unif(0, \frac{0.1}{K})$  for each topic. Here  $K$  is the  
647 number of topics.
- 648 • The age profiles are then normalised at each age point to ensure  $\sum_{j=1}^D \beta_j(t) = 1$  for all  
649  $t$ . With this constraint we could sample a disease at each age  $t$  using a multinomial  
650 probability with the topic loading as the parameter. The age range of the simulated topics

651 is 30 to 81 years of age, which is the minimal and maximal age at diagnosis of incident  
652 disease in the UK Biobank population. An example of a simulated topic is shown in  
653 Supplementary Figure 27.

654  
655 For each individual, we sampled the Dirichlet parameter  $\alpha$  from a gamma distribution (shape =  
656 50, rate = 50 ). Topic loadings are sampled from the Dirichlet distribution for each patient as the  
657 generative process. For each patient, we first sample the number of diseases  $N_S$ . For each  
658 incident disease, we sample the disease age from uniform distribution between age 30 to 81 and  
659 a topic from the topic loading. We then choose the incident disease based on the age at diagnosis  
660 from the chosen topic. The procedure follows the generative process described in Supplementary  
661 Note.

662  
663 Since in real data we only use the first age at diagnosis for diseases that are recorded repeatedly  
664 within the same patient, we filter the simulated diseases accordingly. The filtered data are fed  
665 into the inference functions to infer the latent topics and disease assignments. The inferred topics  
666 resemble the true topics used to simulate diseases as shown in Supplementary Figure 27. For the  
667 initialisation of each inference, we first sample  $\beta$  and  $\theta$  from the Dirichlet distribution of non-  
668 informative hyperparameters, then initialise other variables parameters following the generative  
669 process. The variational inference converged where the relative increase of ELBO is below  $10^{-6}$ .

670  
671 To simulate disease having distinct comorbidity subtypes, we first simulate diseases using the  
672 procedure described above. We consider two scenarios: (1) the subtype of diseases have the  
673 same age at diagnosis distribution. (2) the subtypes of disease have distinct age at diagnosis  
674 distribution.

675  
676 We create diseases with distinct comorbidity profiles by combining diseases that are sampled  
677 from distinct topics and labelling them as a single disease. We first chose one disease (**disease**  
678 **A**) then sampled a proportion of a second disease (**disease B**) to label as **disease A**. The  
679 proportion is varied to create a different sample size ratio of the two subtypes. In scenario one,  
680 **disease B** is a disease that has the exact same age age distribution as **disease A** but from the other  
681 topic. In scenario two, **disease B** is from the other topic and has a different age distribution (age  
682 at diagnosis moves up for 20 years, 10 years, or 5 years, respectively) than **disease A**. After  
683 changing the labels of **disease B** to be the same as **disease A**, we used the inference procedure  
684 described as above to get the posterior distribution.

685  
686 To evaluate whether a model could capture the comorbidity subtypes, we compute the precision,  
687 recall, and area under precision-recall curve (AUPRC) to correctly classify incident **disease B** to  
688 be from the topic that it is generated from. The topic of each diagnosis is determined by  
689 diagnosis-specific topic probability. We use other diseases from the topic of **disease B** to  
690 benchmark the topic label. Topic modelling on the simulated data is performed with both ATM

691 and LDA (both implemented using collapsed variational inference for fair comparison) to  
692 compare the performances.

693

694 We evaluate the subtype classification with varying values for three simulation parameters:

- 695 ● ratio of sample sizes between the two subtypes. We change the ratio of the two subtypes  
696 by a grid between 0 to 0.9 with a step size 0.1. The default value of sample size ratio is  
697 set as 0.1 in other simulations to test for other parameters that have impacts on the  
698 precision and recall.
- 699 ● Simulated population size. We simulated population sizes equal to 200, 500, 1000, 2000,  
700 5000, and 10,000. The default population size is 10,000 in other simulations.
- 701 ● Number of distinct diseases. We simulated datasets with 20, 30, 40, and 50 distinct  
702 diseases, with 2, 3, 4 and 5 underlying disease topics respectively. The default number of  
703 distinct diseases is 20 in other simulations.
- 704 ● Difference of age distribution. We considered three scenarios of subtype age distribution,  
705 with 0, 10, and 20 years of difference in the average age at diagnosis.

706

707

#### 708 **UK Biobank comorbidity data.**

709 We analysed comorbidity data from 282,957 UK Biobank samples with diagnoses for at least  
710 two of the 348 focal diseases that we studied (see below). We use the hospital episode statistics  
711 (HES) data within the UK Biobank dataset, which records diseases using the ICD-10/ICD-10CM  
712 coding system. Codes started with letters from A to N are kept as they correspond to disease  
713 code (opposed to procedure codes). The disease records were mapped from ICD-10/ICD-10CM  
714 codes to PheCodes using a three-step procedure: Firstly, we map the first four letters of each  
715 ICD-10 records to the phecodes, using the map file downloaded from [phewascatalog.org](http://phewascatalog.org);  
716 Secondly, we map the remaining records using ICD-10CM map file downloaded from  
717 [phewascatalog.org](http://phewascatalog.org); Lastly, we map remaining records to a collapsed ICD-10CM mapping  
718 system which only use the first four character of ICD-10CM codes. We also noticed an ICD-  
719 10/ICD-10CM code could map to multiple PheCodes. When a single ICD-10/ICD-10CM code s  
720 mapped to more than one PheCodes, we only kept the Phecode that are mapped to the most ICD-  
721 10 codes (i.e. PheCode is constructed by combining ICD-10 that represent similar diseases. The  
722 Phecode that represent a larger number of ICD-10 codes are more likely to be a well defined  
723 disease, which we chose to keep.), which ensure that one ICD-10(CM) code only maps to one  
724 PheCode. Using the procedure above, we mapped 99.7% ICD-10/ICD-10CM code to PheCodes,  
725 with 4,637,127 records in total.

726

727 The mapped Phecodes are filtered to keep only the first age at diagnosis for the same diseases  
728 within a patient. The age at diagnosis for each record is computed as the difference between  
729 month of birth to the episode starting date. We then computed the occurrence of each disease in  
730 the UK Biobank and kept 348 that have more than 1,000 occurrences (Supplementary Table 4).

731 Starting with all 488,377 UK Biobank patients (including both European and non-European  
732 ancestries), we filtered the patients to keep only those who have at least two distinct diseases  
733 from the 348 focal diseases, as we are most interested in the comorbidity information. We treated  
734 the death as an additional disease (8,666 records) to evaluate if certain comorbidities are more  
735 likely to lead to fatal events. After these procedures, there are in total 1,726,144 distinct records  
736 across 282,957 patients.

737  
738 To name the topics inferred from the UK Biobank, we take the sum of average topic assignments  
739 (section Inference of ATM) over diseases that are within each phecode system and extract the  
740 top 3 systems. Most of comorbidity topics are named using the first three topics (e.g. CER:  
741 cardiovascular, endocrine/metabolic, respiratory), except for topics that are predominantly  
742 associated with one system (LGI: lower gastrointestinal; UGI: upper gastrointestinal; CVD:  
743 cardiovascular).

744  
745 We present focal diseases for each topic in two ways. Firstly, we filter each topic using the  
746 profile mean value between age 30 to 81 to keep the top seven diseases. We chose seven for  
747 visualisation, as we found more diseases would be harder to read on a plot. Secondly, we also  
748 show seven diseases that have the highest average assignment to each topic. This will give a  
749 picture of diseases that are not the most prevalent in the population but are predominantly  
750 associated with the target topic.

751  
752 To compare the comorbidity heterogeneity between age groups, we group the incidences for each  
753 disease to two age groups: young group (<60 years of age) and old group ( $\geq 60$  years of age). We  
754 compute the average topic assignment of each group as described in section Inference of ATM.  
755 Additionally, we inferred topics for male (984,554 records in 156,366 individuals) and female  
756 (741,590 records in 126,591 individuals) populations respectively using a model with 10 topics  
757 and spline function with one knot. We extract the average topic assignment for each disease, and  
758 use Pearson's correlation to match the topics for both sexes to the topics inferred on the entire  
759 population.

760  
761 Each diagnosis could be assigned to a specific topic using max diagnosis-specific topic  
762 probability. We focus our disease heterogeneity analysis on 52 diseases that have at least 500  
763 incidences assigned to a secondary topic.

764  
765 **UK Biobank genotype data.**

766 For all analyses except BOLT-LMM we use 488,377 UK Biobank participants. For BOLT-LMM  
767 analyses, we constrain our analysis to 409,694 British Isle ancestry individuals to remove the  
768 possibility that topics are capturing population structure. For  $F_{ST}$  analysis with PLINK we used  
769 805,426 genotyped SNPs; for BOLT-LMM PRS analysis we used 727,882 genotyped SNP with  
770  $MAF > 0.1\%$ ; for genetic correlation analysis using LDSC, we used 157,756 Genotyped SNPs

771 mapped to HapMap3 SNPs; for BOLT-LMM and subsequent LDSC analysis that use imputed  
772 SNPs, we used 1,201,838 imputed SNPs mapped to HapMap3 SNPs.

773

#### 774 **Polygenic risk scores (PRS) analysis.**

775 To exclude the possibility of population stratification, we compute PRS using mixed-effect  
776 association on the British Isle ancestry group ( $N = 409,694$ ) for the 10 heritable diseases that  
777 have the highest heritability z-scores. We used a mixed model to estimate effect size  
778 implemented by BOLT-LMM and constructed genome-wide PRS<sup>50</sup>. For the computation of  
779 PRS, we randomly sampled half of the British isle ancestry population ( $N = 204,847$ ) for  
780 computation efficiency (essential hypertension, arthropathy, asthma, and hypercholesterolemia)  
781 or sampled 9 controls for each case to ensure case proportion at or above 10% as recommended  
782 by BOLT-LMM (type 2 diabetes, varicose veins of lower extremity, hypothyroidism, other  
783 peripheral nerve disorders, major depressive disorder, and GRED). We used PLINK to select  
784 genotyped SNPs with  $MAF > 0.1\%$  as recommended in BOLT-LMM. For each disease, we used  
785 5-fold cross validation to estimate effect sizes using BOLT-LMM and computed the PRS on the  
786 held-out testing set. The predictive PRS are then used to compute the excess PRS over different  
787 topic loadings, by a linear regression where PRS is the response variable and topic weights is the  
788 predictor.

789

790 We compute the relative risk for each percentile of PRS using the following formula:

$$791 \quad RR_{pt,s} = \frac{n_{pt,s} \times 100}{n_s},$$

792 where  $RR_{pt,s}$  is the relative risk of  $s$  subtype for the  $pt^{th}$  PRS percentile (computed for the entire  
793 population);  $n_{pt,s}$  is the number of cases in  $s$  subtype that has PRS within the  $pt^{th}$  percentile;  $n_s$   
794 is the number of cases in the  $s$  subtype.

795

#### 796 **Genetic correlation analysis.**

797 For each disease and disease subtype, we use a case-control matching strategy to construct data  
798 to estimate coefficients for genetic correlation analysis. For each case in the disease group, we  
799 pick four nearest neighbors (without replacement) from the control group, matching sex, BMI,  
800 year of birth and 40 genetic principal components. The covariates are available within the UK  
801 Biobank data set, over which we computed the principal components. We then compute the  
802 Euclidean distance of the principal components to find the nearest neighbours in the population.  
803 All cases are matched with four controls except for 401.1 essential hypertension which has a  
804 sample size larger than 20% of the population. We match only one control for each hypertension  
805 case.

806

807 We perform logistic regression with sex and top 10 principal components as covariates to  
808 estimate the main variant effect of the 805,426 variants that are genotyped. We used PLINK 1.9  
809 for association analysis<sup>71</sup>. With the summary statistics from the association analysis, we use

810 LDSC to map the summary statistics to HapMap3 SNPs and match the effect and non-effect  
811 alleles<sup>2,72</sup>. Since UK Biobank is mostly of British Isle ancestry, we use the pre-computed LD  
812 score from the LDSC website. We estimated the heritability for each disease or disease subtype  
813 which has more than 1000 incidences (378 diseases subtypes and diseases). We use 1000  
814 incidence threshold as LDSC are more accurate with larger sample size. We focus on 71 disease  
815 and 18 disease subtypes that have heritability z-score above 4 for genetic correlation analysis.

816

817 The genetic correlation is computed for each pair of disease/subtypes using the same summary  
818 statistics and LD score regression. We report the estimate of genetic correlation and z-scores.  
819 Additionally, for pairs that involve subtypes (disease-subtype or subtype-subtype), we compute  
820 the excess genetic correlation, defined as the difference between the genetic correlation  
821 involving subtypes and the genetic correlation involving all disease diagnoses. For example, the  
822 genetic correlation between T2D-CER and hypertension-CVD is compared to the genetic  
823 correlation between all T2D and all hypertension. The z-score and p-value of the genetic  
824 correlation differences are reported. We note that genetic correlations between subtypes of the  
825 same disease are compared to 1. We only reported p-values of excess genetic correlation when  
826 both genetic correlation estimation has standard error <0.1 and at least one of the genetic  
827 correlation has  $|z\text{-score}|>4$ .

828

829 To avoid potential collider effects where subtypes are defined by topic components that are  
830 independent of the diseases, we further match cases in each subtype with controls that match the  
831 topic loadings. We computed PCs from 23 variables (10 topic loadings, 10 PCs, year of birth,  
832 sex, and BMI) and use the nearest neighbour procedure (by Euclidean Distance) to find controls  
833 for each case. Here controls are chosen from individuals without the targeting disease, i.e. an  
834 individual with one subtype of the target disease could not be a control for the other subtypes.  
835 We performed the same analysis using this case-control matching procedure and compared the  
836 genetic correlation with the case-control procedure described above. We perform the analysis for  
837 four diseases that have evidence for genetic subtypes: asthma, type 2 diabetes,  
838 hypercholesterolemia, and hypertension. For one subtype (hypertension-CVD), the heritability  
839 (0.0313, s.e. = 0.0289) is below threshold after matching the topic, which was excluded in  
840 genetic correlation analysis.

841

#### 842 **$F_{ST}$ analysis.**

843 To evaluate the genetic heterogeneity between disease subtypes, we estimated the  $F_{ST}$  for 52  
844 diseases that have at least 500 incidences assigned to a secondary topic. To test the statistical  
845 significance of  $F_{ST}$ , we adopted a permutation strategy and sampled the same number of controls  
846 of similar topic weights distribution for each subtype. The topic weights are matched by  
847 sampling (without replacement) the same number of controls for each dominant topic weight  
848 quartile of the cases (i.e. matching the topic that defines the subtype), which ensures the controls  
849 have the same topic weight stratification as the disease subtypes. We then compute the  $F_{ST}$  across

850 the control groups matched for subtypes. We excluded three diseases, “hypertension”,  
851 “hypercholesterolemia”, and “arthropathy”, from  $F_{ST}$  analysis as we do not have enough controls  
852 that match topic weight distribution. The  $F_{ST}$ s are computed using PLINK 1.9's weighted mean  
853 across all genotyped SNPs, which report  $F$  statistics across all subtypes.

854

855 We obtained 1,000 permutation samples and reported the permutation p-value. Under the  
856 assumption that causal and non-causal variants have similar allele frequency differences across  
857 the subtypes,  $F_{ST}$  could be a measure of causal genetic effect heterogeneity across subtypes.

858

### 859 **SNP x topic interaction test.**

860 For the diseases that have heritability z-score above 4 in the UK Biobank, we further investigated  
861 whether there are interactions between genetic risk factors with the topic loadings. We used a fit  
862 a logistic regression model using following model:

$$863 \quad \text{logit}(p) = \beta_0 + \beta_1 * T + \beta_2 * T^2 + \beta_3 * G + \beta_4 * G * T,$$

864 where  $T$  is individual topic weights for a specified topic,  $G$  is the genotype, and  $p$  is the  
865 probability of getting the disease. We computed the test statistics under the null that  $\beta_4 = 0$ . We  
866 used QQ plots to check that the test statistics are well calibrated for each disease-topic pair.

867

868 Since the simulation shows the interaction test is underpowered when the variant effects are  
869 small, we focus on the set of SNP that reaches genome-wide significance level to increase power  
870 to detect interaction effects. We performed LD-clumping using  $r^2 > 0.6$  to remove variants that  
871 are in strong LD with the lead variants. We computed the test statistics using the model above  
872 (for testing  $\beta_4 = 0$ ) and computed study-wise FDR across disease-topic pairs.

873

874 To verify the significant interactions, we divided cases into quartiles based on topic loading for  
875 each disease-topic pair, and randomly sampled two controls that match the topic loading for each  
876 case. We estimated the main effect sizes for all GWAS-SNP within each quartile of topic  
877 loadings to capture effects that are modulated by topic weights. We focus on the SNPs that have  
878 significant interaction test statistics computed in the previous step and compare it with  
879 background SNPs that have genome-wide significant main effects but no interaction effect  
880 ( $P > 0.05$ ).

881

### 882 **Simulations of SNP x topic interaction**

883 We simulate comorbidity with genetics to test interaction between genetic and comorbidity  
884 topics. We simulated 100 independent variants with MAF randomly sampled from  $Unif(0, 0.5)$ .  
885 We assumed an additive model and simulated genotypes for the population using Hardy-  
886 Weinberg equilibrium. We simulated three types of genetic effects on topic and diseases on topic  
887 of the simulation framework described in Simulations of ATM method section:

- 888 • Genetics-topic effect: each variant is simulated to have an linear effect of 0.04 on the  
889 topic loading. We choose this value as after normalising the topic, a regression of causal



- 890 variant to topic would have an effect size approximately 0.01 which is similar to our  
891 observation in the UK Biobank. The number of variants that are causal to the topic varies  
892 between 2 to 20. We simulated the effect on one topic by adding additive SNP effects and  
893 normalise the topic loadings of each patient. The topic-disease causality is a natural  
894 consequence following the generative process of sampling data.
- 895 ● Genetic-disease-topic effect: we simulated a heritable disease that is causal to the topic.  
896 The disease is simulated with 20 causal variants each of effect size 0.15. We vary the  
897 disease-to-topic causal effect from 0.05 to 0.5, with a default value of 0.1 in other  
898 analyses (similar to the correlation we found in UK Biobank analysis). We simulated the  
899 effect on one topic by adding additive causal disease effects and normalise the topic  
900 loadings of each patient.
  - 901 ● The genetic effect could interact with the topic when contributing to disease risk. We  
902 simulated four additional diseases to represent different structures (Supplementary Figure  
903 22).
    - 904 ○ Genetic effects interact with topic loading on altering disease risk. The interaction  
905 term is added to the mean of disease liability, which is sampled from a Gaussian  
906 distribution. The disease is then sampled by a threshold on the liability, where the  
907 incidence rate is by default 0.5. The interaction effect is varied from 0.4 to 4, with  
908 default value equal to 2.
    - 909 ○ Pleiotropy effects are simulated with a variant that have both genetic-disease and  
910 genetic-topic-disease effects. Both genetic and topic effects are added to the mean  
911 of disease liability. A disease is sampled by a threshold with default incidence rate  
912 equal to 0.5. The topic-disease effect is varied from 0.4 to 4, with default value  
913 equal to 2.
    - 914 ○ Pleiotropy effect with nonlinear topic-disease effect. A quadratic term of topic-  
915 disease effect added to the second model.
    - 916 ○ Pleiotropy effect with nonlinear genetic-disease effect. A quadratic term of  
917 genetic-disease effect added to the second model.

918  
919 For disease-topic or topic-disease causal effects, we simulated 50 repetition at each causal effect  
920 size. For interaction analysis, we repeated 10 times at each parameter value, as there are more  
921 SNPs for uncertainty estimation. The simulated disease sets are fed into the inference procedure  
922 to infer the patient topic weights.

923

924

925

926

927 **Tables**

928

| Acronym | Disease systems                                      | Representative diseases                                                                                   | Number of associated diseases |
|---------|------------------------------------------------------|-----------------------------------------------------------------------------------------------------------|-------------------------------|
| NRI     | Neoplasms, respiratory, infectious diseases          | Secondary malignancy of lymph nodes;<br>Pneumococcal pneumonia;<br>Bacterial infection NOS                | 53                            |
| CER     | Circulatory system, endocrine/metabolic, respiratory | Type 2 diabetes;<br>Obesity;<br>Chronic airway obstruction                                                | 41                            |
| SRD     | Sense organs, respiratory, dermatologic              | Cataract;<br>Septal Deviations/Turbinates Hypertrophy;<br>Benign neoplasm of skin                         | 38                            |
| CVD     | Cardiovascular disease                               | Hypercholesterolemia;<br>Coronary atherosclerosis;<br>Myocardial infarction                               | 27                            |
| UGI     | Upper gastrointestinal disease                       | Diaphragmatic hernia;<br>Benign neoplasm of other parts of digestive system;<br>Gastritis and duodenitis; | 22                            |
| LGI     | Lower gastrointestinal disease                       | Irritable Bowel Syndrome;<br>Benign neoplasm of colon;<br>Anal and rectal polyp;                          | 13                            |
| FGND    | Female genitourinary, neoplasms, digestive           | Uterine leiomyoma;<br>Malignant neoplasm of female breast;<br>Hypothyroidism NOS                          | 34                            |
| MGND    | Male genitourinary, neoplasms, digestive             | Urinary tract infection;<br>Cancer of prostate;<br>Other disorders of bladder                             | 33                            |
| MDS     | Musculoskeletal, digestive, symptoms                 | Back pain;<br>Cholelithiasis;<br>Other disorders of soft tissues                                          | 29                            |
| ARP     | Arthropathy-related disease                          | Arthropathy NOS;<br>Rheumatoid arthritis;<br>Enthesopathy                                                 | 26                            |

929

930

931

932 **Table 1. Summary of 10 inferred disease topics in the UK Biobank.** For each topic, we list its

933 3-letter acronym, disease systems, representative diseases, and number of associated diseases

934 (defined as diseases with average diagnosis-specific topic probability >50% for that topic).

935 Topics are ordered by the Phecode system (see Figure 3). 316 of 348 diseases analysed are

936 associated with a topic; the remaining 32 diseases do not have a topic with average diagnosis-

937 specific topic probability >50%.

938

939

940 **Figures**

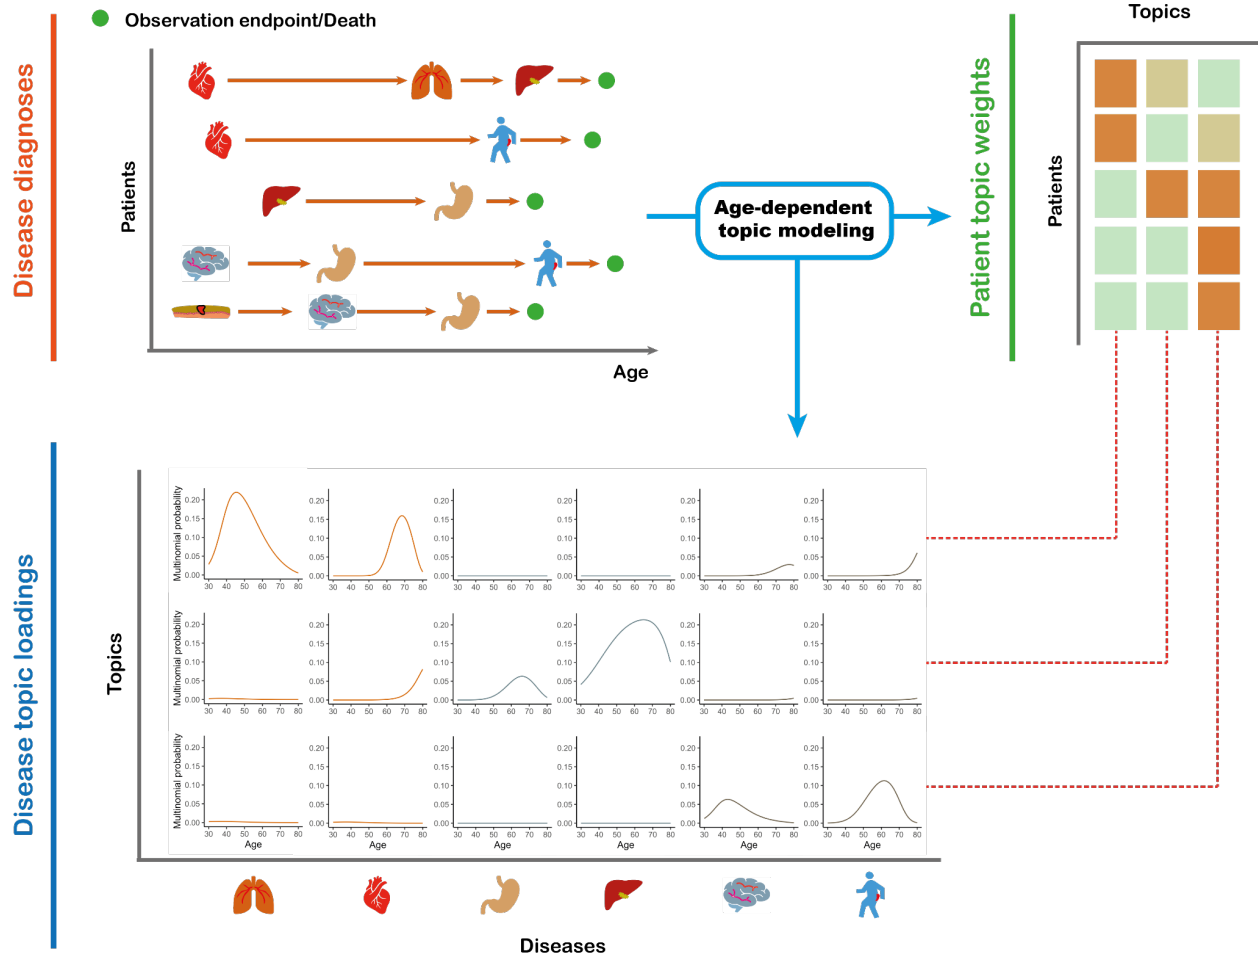

941 **Figure 1: ATM provides an efficient way to represent longitudinal comorbidity data.** Top  
942 left: input consists of disease diagnoses as a function of age. Top right: ATM assigns a topic  
943 weight to each patient. Bottom: ATM infers age-dependent topic loadings.  
944

945  
946  
947  
948

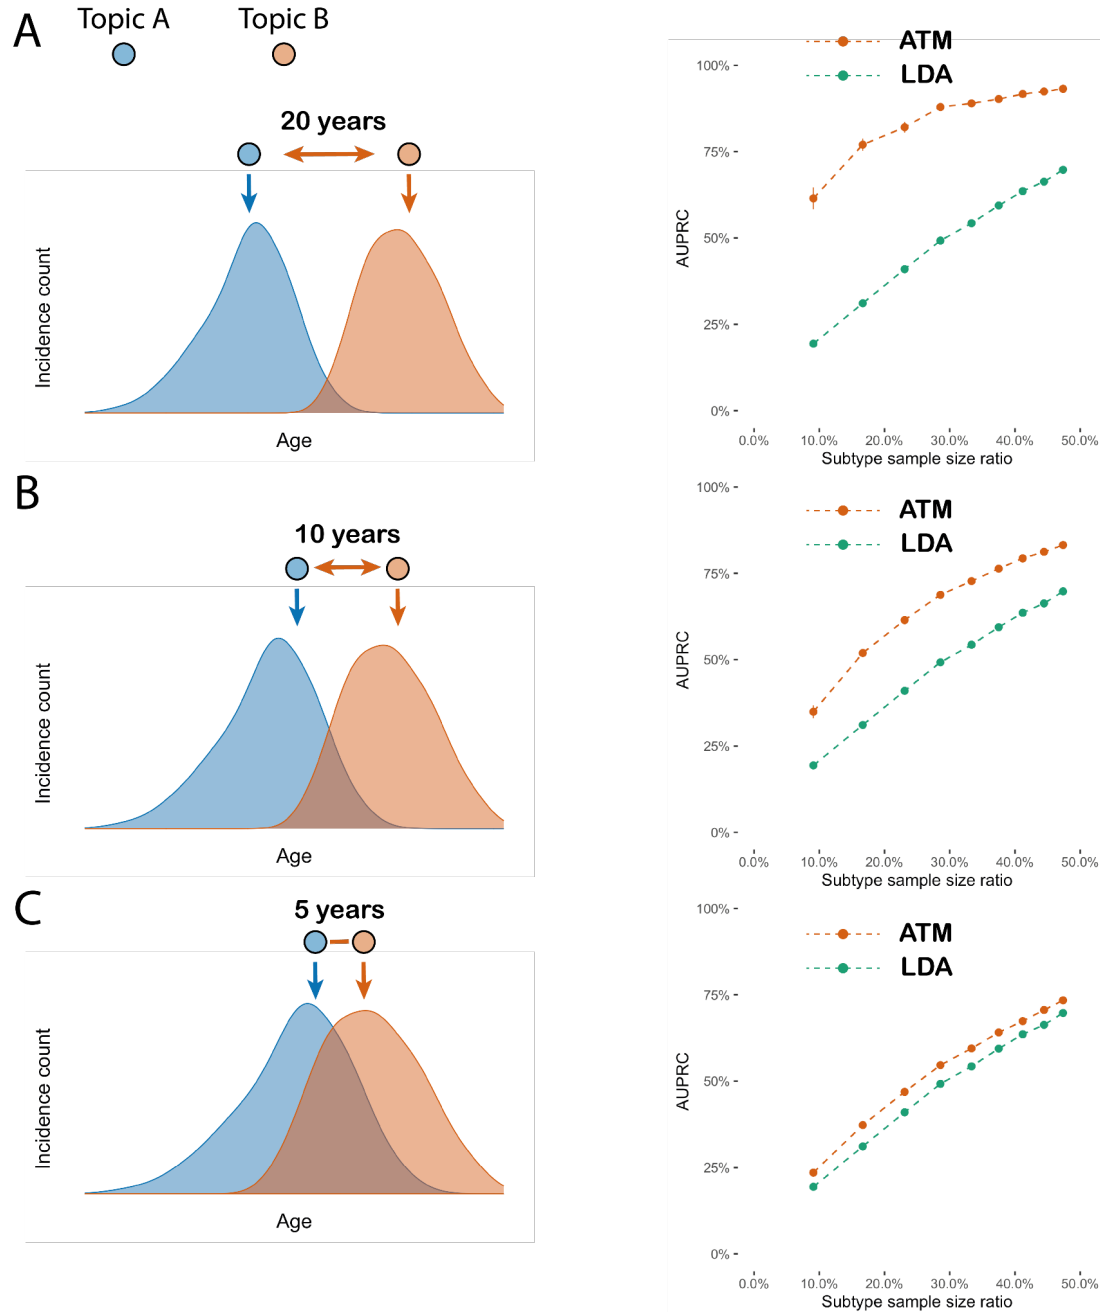

949

950 **Figure 2: ATM outperforms LDA in simulations with age-dependent effects.** In simulations  
951 at different levels of age-dependent effects (left panels), we report the area under the precision  
952 and recall curve (AUPRC) for ATM vs. LDA as a function of subtype sample size proportion  
953 (the proportion of diagnoses belonging to the smaller subtype) (right panels). Each dot represents  
954 the mean of 100 simulations of 10,000 individuals. Error bars denote 95% confidence intervals.  
955 (A) 20-year difference in age at diagnosis for the two subtypes. (B) 10-year difference in age at  
956 diagnosis for the two subtypes. (C) 5-year difference in age at diagnosis for the two subtypes.  
957 Numerical results are reported in Supplementary Table 2.

958

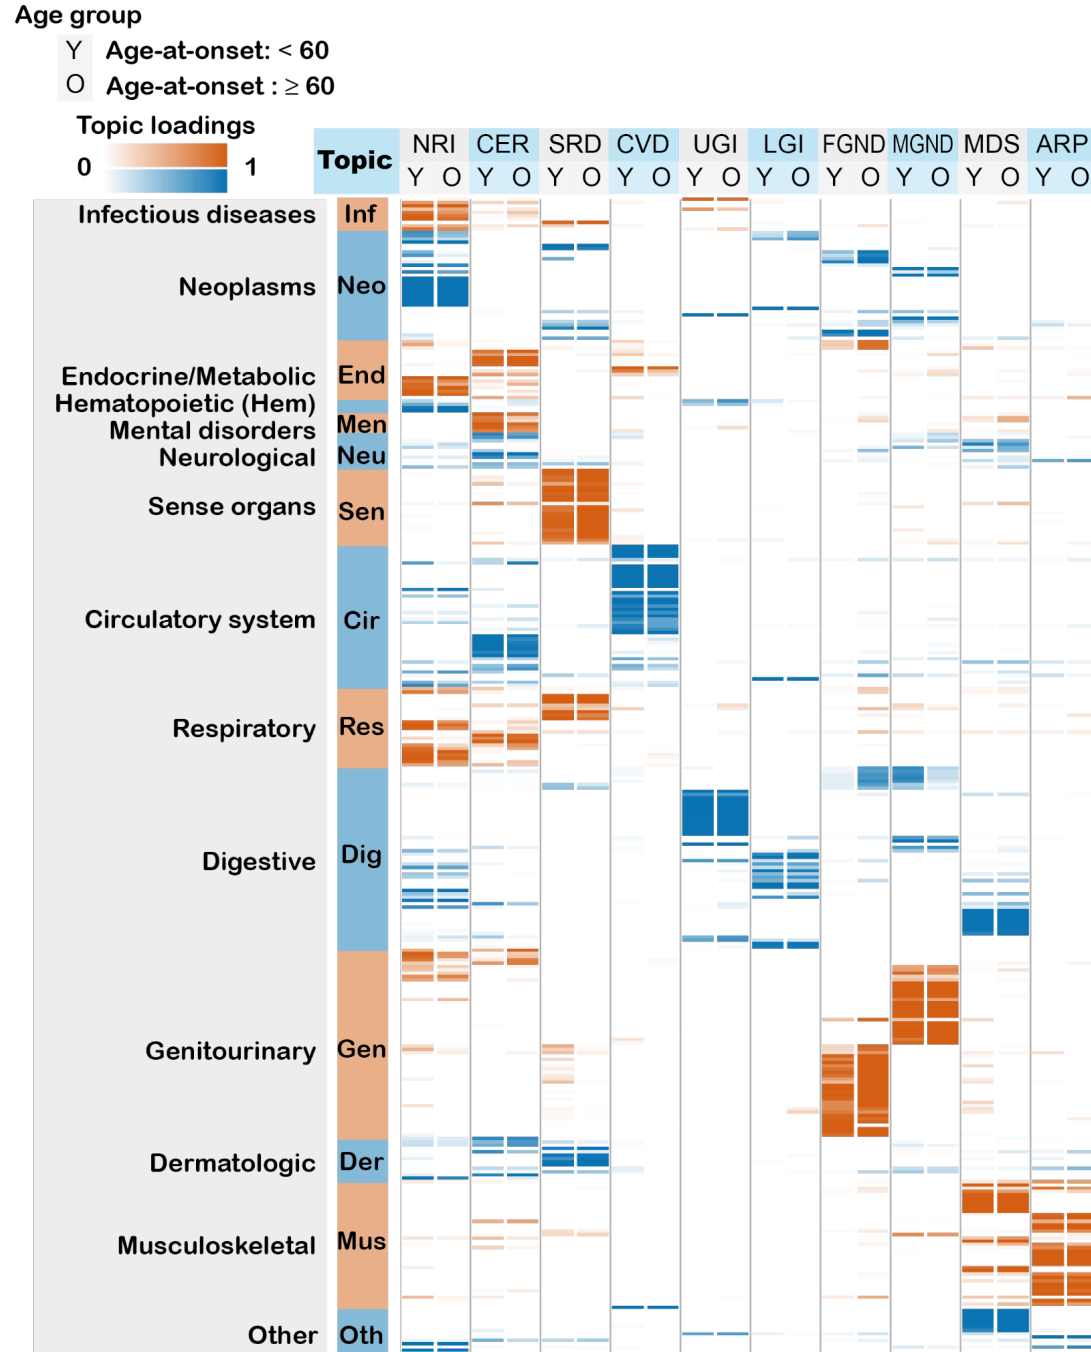

959

960

961

962

963

964

965

966

**Figure 3. Age-dependent topic loadings of 10 inferred disease topics across 348 diseases in the UK Biobank.** We report topic loadings averaged across younger ages (age at diagnosis < 60) and older ages (age at diagnosis > 60). Row labels denote disease categories ordered by Phecode systems, with alternating blue and red color for visualisation purposes; “Other” is a merge of five Phecode systems: “congenital anomalies”, “symptoms”, “injuries & poisoning”, “other tests”, and “death” (which is treated as an additional disease, see Methods). Topics are ordered by the corresponding Phecode system. Further details on the 10 topics are provided in Table 1. Further

967 details on the diseases discussed in the text (type 2 diabetes and breast cancer) are provided in  
968 Supplementary Figure 6. Numerical results are reported in Supplementary Table 4.  
969  
970

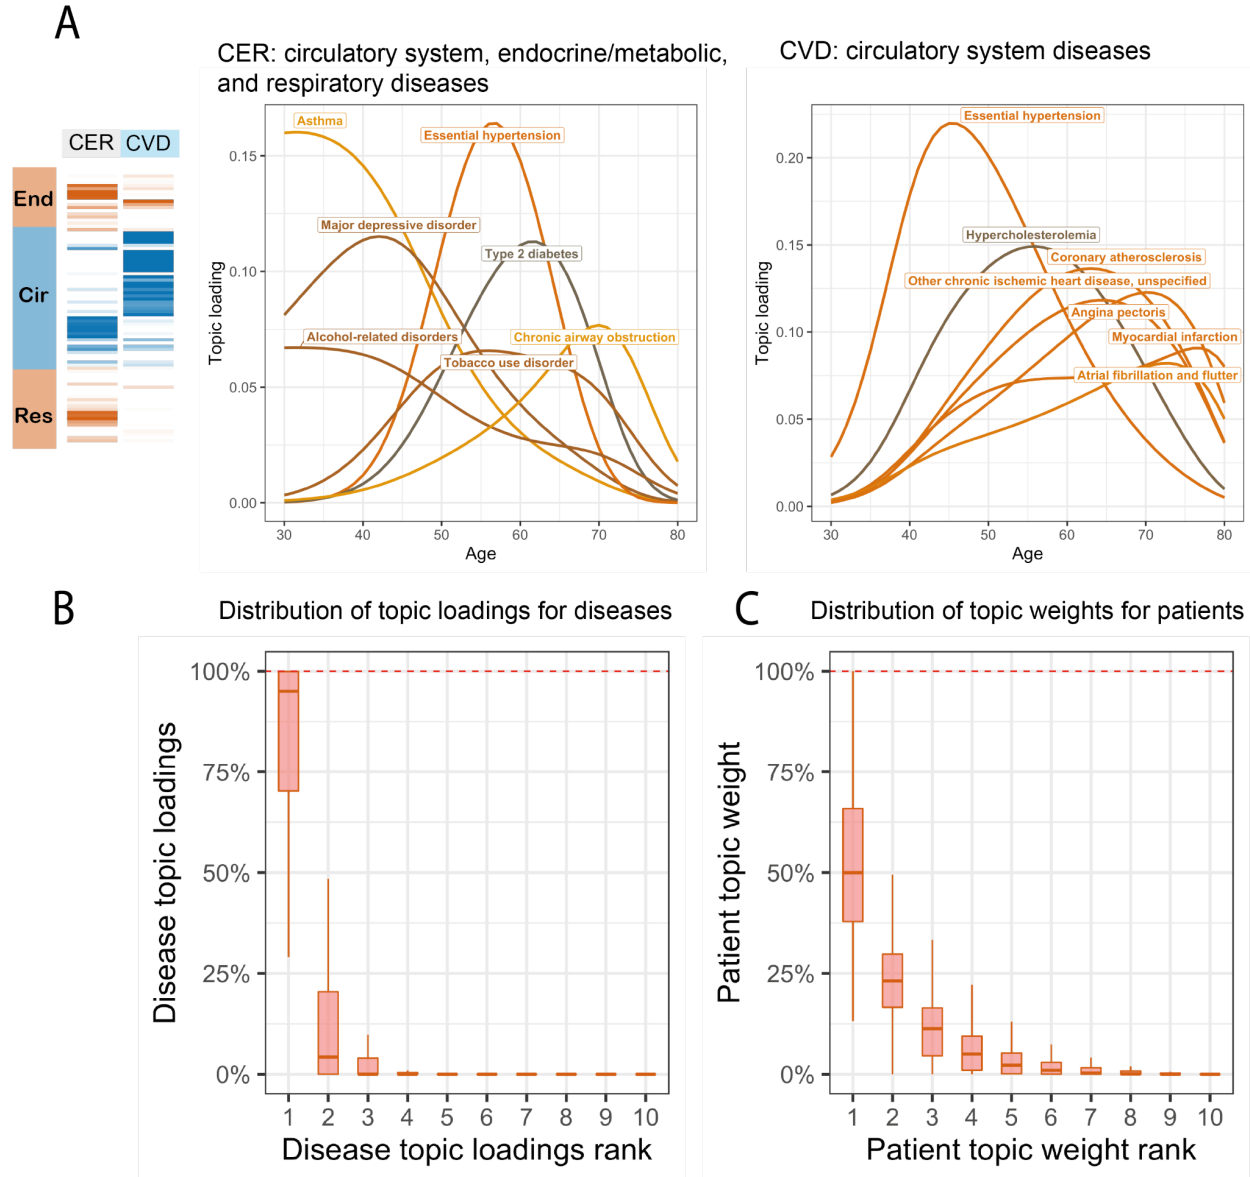

971  
972 **Figure 4. Topic loadings capture age-dependent comorbidities.** (A) Age-dependent topic  
973 loadings for two representative topics, CER and CVD; for each topic, we include the top seven  
974 diseases with highest topic loadings. Results for all 10 topics are reported in Supplementary  
975 Figure 13. (B) Box plot of disease topic loading as a function of rank; disease topic loadings are  
976 computed as a weighted average across all values of age at diagnosis. (C) Box plot of patient  
977 topic weight as a function of rank. Numerical results are reported in Supplementary Table 5.  
978

979

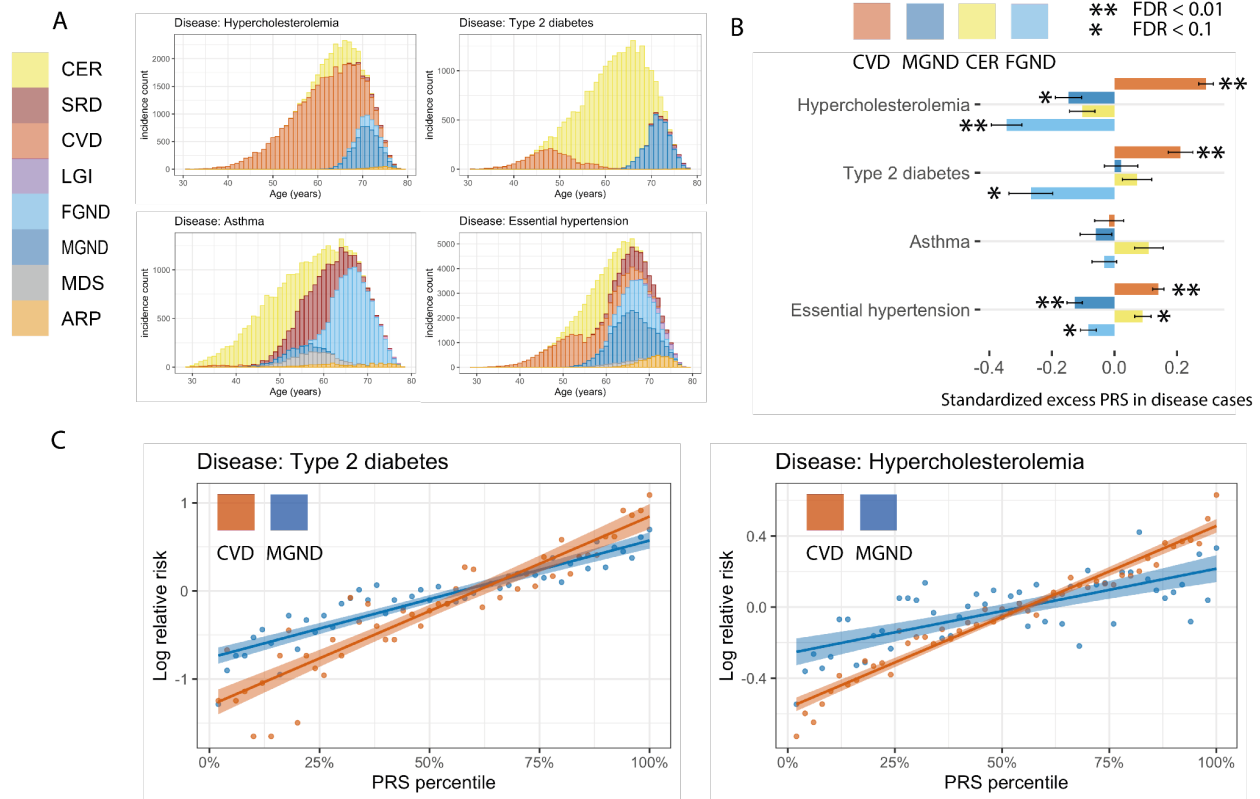

980

981 **Figure 5. Polygenic risk scores vary across disease subtypes defined by distinct topics. (A)**

982 Stacked barplots of age-dependent subtypes (defined by topics) for 4 representative diseases

983 (type 2 diabetes, asthma, hypercholesterolemia, and essential hypertension); for each disease, we

984 include all subtypes with at least one diagnosis. Results for all 52 diseases are reported in

985 Supplementary Figure 16. (B) Standardised excess PRS values in disease cases (s.d. increase in

986 PRS per unit increase in patient topic weight) for 4 representative diseases and 4 corresponding

987 topics. (C) Relative risk for cases of type 2 diabetes and hypercholesterolemia of CVD and

988 MGND subtypes (vs. controls) across PRS percentiles. Each point spans 2 PRS percentiles.

989 Lines denote regression on log scale. Error bars denote 95% confidence intervals. Numerical

990 results are reported in Supplementary Table 6.

991



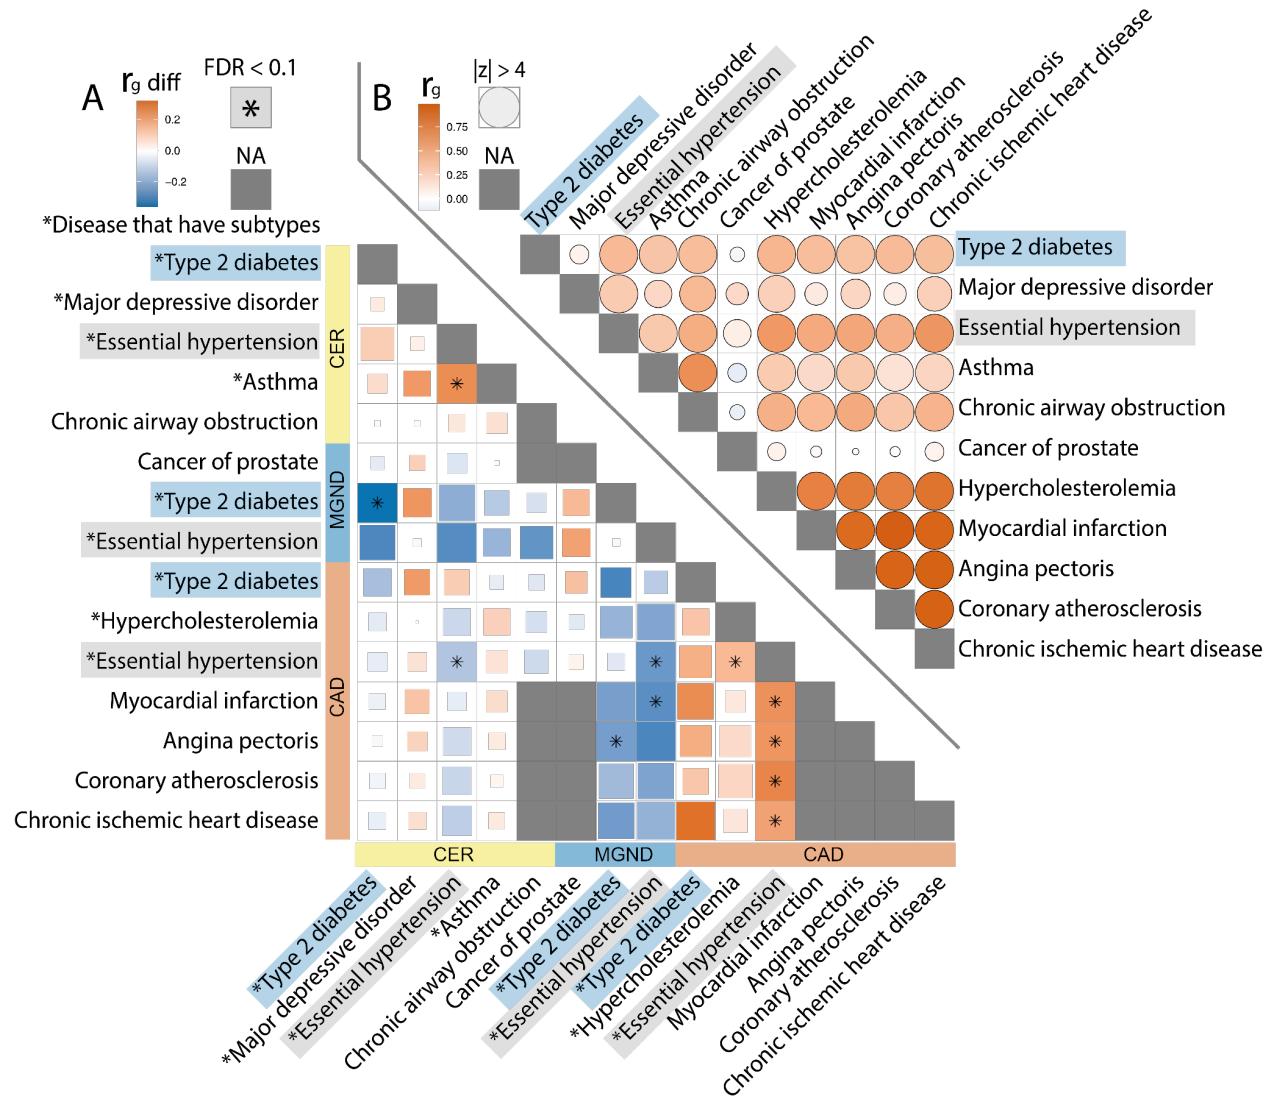

992  
993  
994  
995  
996  
997  
998  
999  
1000  
1001  
1002

**Figure 6. Genetic correlations vary across disease subtypes defined by distinct topics.** (a)

Excess genetic correlations for pairs of 15 disease subtypes or diseases (9 disease subtypes (denoted with asterisks) + 6 diseases without subtypes), relative to genetic correlations between the underlying diseases. Full square with asterisk denotes FDR < 0.1; less than full squares have area proportional to z-scores for difference. Grey squares denote NA (pair of diseases without subtypes or pair of same disease subtype or disease). (b) Genetic correlations between the underlying diseases. Full circle denotes  $|z\text{-score}| > 4$  for nonzero genetic correlation; less than full circles have area proportional to  $|z\text{-score}|$ . Numerical results are reported in Supplementary Table 9.

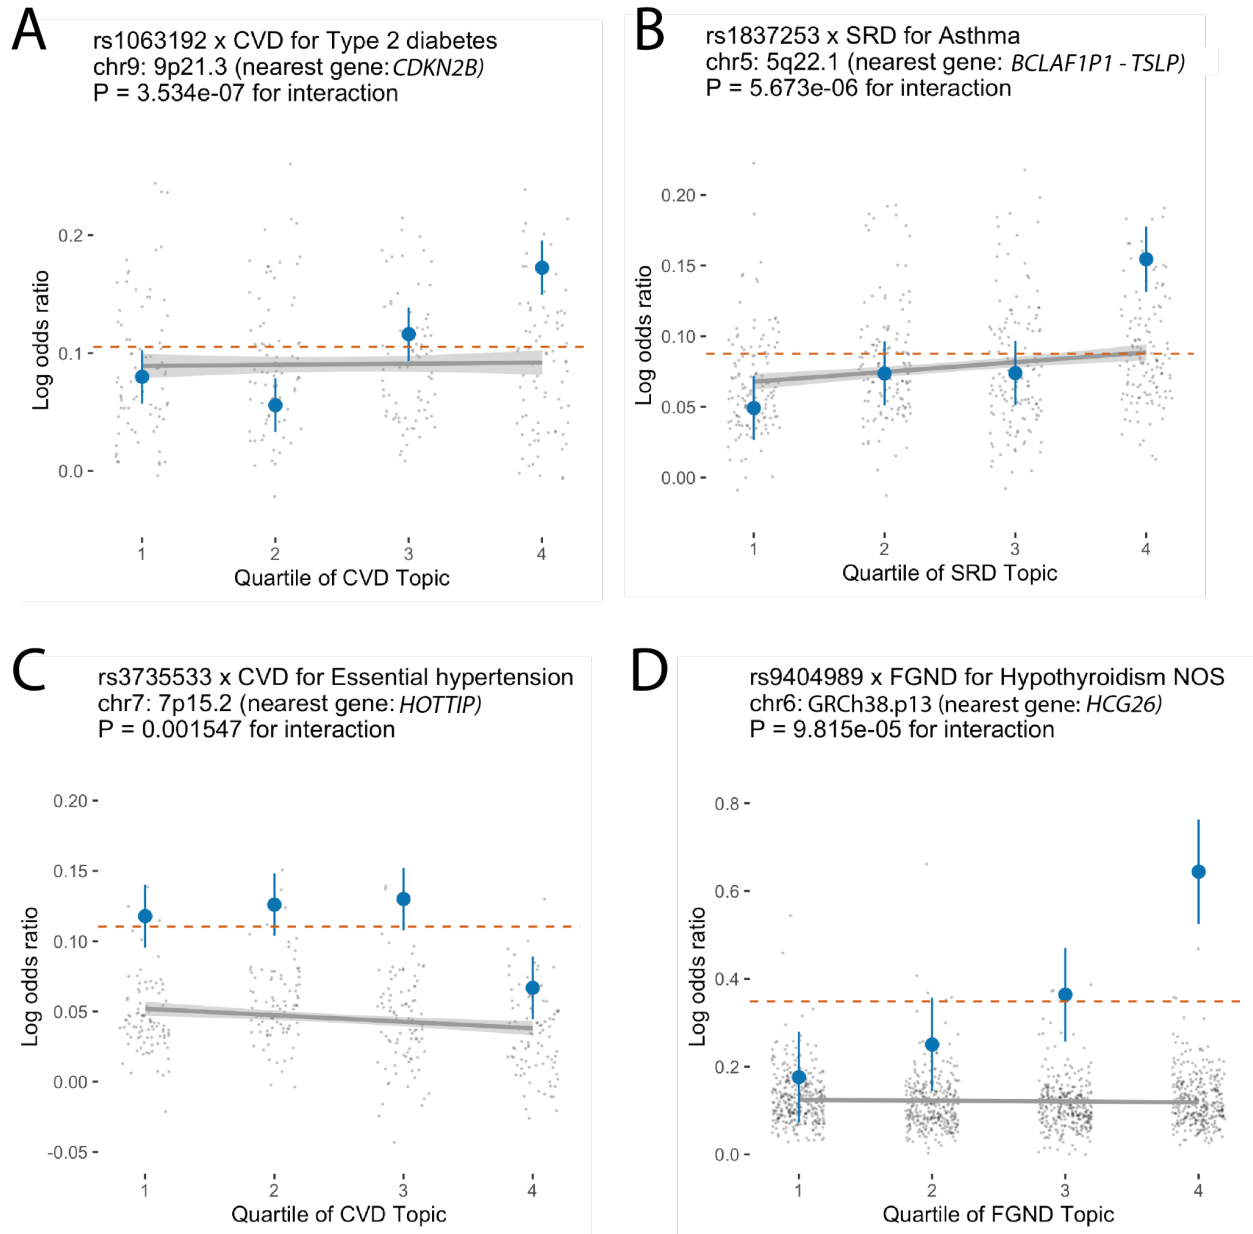

1003  
1004  
1005  
1006  
1007  
1008  
1009  
1010  
1011  
1012

**Figure 7. Examples of SNP x topic interaction effects on disease phenotypes.** For each example, we report main SNP effects (log odds ratios) specific to each quartile of topic weights across individuals, for both the focal SNP (blue dots) and background SNPs for that disease and topic (genome-wide significant main effect ( $P < 5 \times 10^{-8}$ ) but non-significant SNP x topic interaction effect ( $P > 0.05$ ); grey dots). Dashed red lines denote aggregate main SNP effects for each focal SNP. Error bars denote 95% confidence intervals. Grey lines denote linear regression of grey dots, with grey shading denoting corresponding 95% confidence intervals. Numerical results are reported in Supplementary Table 14.

## 1013 References

- 1014 1. Abul-Husn, N. S. & Kenny, E. E. Personalized Medicine and the Power of Electronic Health  
1015 Records. *Cell* **177**, 58–69 (2019).
- 1016 2. Bulik-Sullivan, B. *et al.* An atlas of genetic correlations across human diseases and traits.  
1017 *Nat. Genet.* **47**, 1236–1241 (2015).
- 1018 3. Wang, K., Gaitsch, H., Poon, H., Cox, N. J. & Rzhetsky, A. Classification of common  
1019 human diseases derived from shared genetic and environmental determinants. *Nat. Genet.*  
1020 **49**, 1319–1325 (2017).
- 1021 4. Zhao, W. *et al.* Identification of new susceptibility loci for type 2 diabetes and shared  
1022 etiological pathways with coronary heart disease. *Nat. Genet.* **49**, 1450–1457 (2017).
- 1023 5. Zhu, Z. *et al.* A genome-wide cross-trait analysis from UK Biobank highlights the shared  
1024 genetic architecture of asthma and allergic diseases. *Nat. Genet.* **50**, 857–864 (2018).
- 1025 6. Turley, P. *et al.* Multi-trait analysis of genome-wide association summary statistics using  
1026 MTAG. *Nat. Genet.* **50**, 229–237 (2018).
- 1027 7. O'Connor, L. J. & Price, A. L. Distinguishing genetic correlation from causation across 52  
1028 diseases and complex traits. *Nat. Genet.* **50**, 1728–1734 (2018).
- 1029 8. Cortes, A., Albers, P. K., Dendrou, C. A., Fugger, L. & McVean, G. Identifying cross-  
1030 disease components of genetic risk across hospital data in the UK Biobank. *Nat. Genet.* **52**,  
1031 126–134 (2019).
- 1032 9. Morrison, J., Knoblauch, N., Marcus, J. H., Stephens, M. & He, X. Mendelian randomization  
1033 accounting for correlated and uncorrelated pleiotropic effects using genome-wide summary  
1034 statistics. *Nat. Genet.* **52**, 740–747 (2020).
- 1035 10. Peyrot, W. J. & Price, A. L. Identifying loci with different allele frequencies among cases of  
1036 eight psychiatric disorders using CC-GWAS. *Nat. Genet.* **53**, 445–454 (2021).
- 1037 11. Mattheisen, M. *et al.* Identification of shared and differentiating genetic architecture for

- 1038 autism spectrum disorder, attention-deficit hyperactivity disorder and case subgroups. *Nat.*  
1039 *Genet.* **54**, 1470–1478 (2022).
- 1040 12. Cortes, A. *et al.* Bayesian analysis of genetic association across tree-structured routine  
1041 healthcare data in the UK Biobank. *Nat. Genet.* **49**, 1311–1318 (2017).
- 1042 13. Zhang, H. *et al.* Genome-wide association study identifies 32 novel breast cancer  
1043 susceptibility loci from overall and subtype-specific analyses. *Nat. Genet.* **52**, 572–581  
1044 (2020).
- 1045 14. Mansour Aly, D. *et al.* Genome-wide association analyses highlight etiological differences  
1046 underlying newly defined subtypes of diabetes. *Nat. Genet.* **53**, 1534–1542 (2021).
- 1047 15. Hautakangas, H. *et al.* Genome-wide analysis of 102,084 migraine cases identifies 123 risk  
1048 loci and subtype-specific risk alleles. *Nat. Genet.* **54**, 152–160 (2022).
- 1049 16. Srebro, N. & Shraibman, A. Rank, Trace-Norm and Max-Norm. in *Learning Theory* 545–  
1050 560 (Springer Berlin Heidelberg, 2005).
- 1051 17. Candès, E. & Recht, B. Exact matrix completion via convex optimization. *Commun. ACM*  
1052 **55**, 111–119 (2012).
- 1053 18. Yan, J. & Pollefeys, M. A General Framework for Motion Segmentation: Independent,  
1054 Articulated, Rigid, Non-rigid, Degenerate and Non-degenerate. in *Computer Vision – ECCV*  
1055 *2006* 94–106 (Springer Berlin Heidelberg, 2006).
- 1056 19. Ma, Y., Derksen, H. & Hong, W. Segmentation of multivariate mixed data via Lossy data  
1057 coding and compression. *IEEE Trans. Pattern Anal. Mach. Intell.* **29**, 1546–1562 (2007).
- 1058 20. Rao, S., Tron, R., Vidal, R. & Ma, Y. Motion segmentation in the presence of outlying,  
1059 incomplete, or corrupted trajectories. *IEEE Trans. Pattern Anal. Mach. Intell.* **32**, 1832–  
1060 1845 (2010).
- 1061 21. Liu, G. & Yan, S. Latent Low-Rank Representation for subspace segmentation and feature  
1062 extraction. in *2011 International Conference on Computer Vision* 1615–1622  
1063 ([ieeexplore.ieee.org](http://ieeexplore.ieee.org), 2011).

- 1064 22. Liu, Z. *et al.* Efficient Low-rank Multimodal Fusion with Modality-Specific Factors. *arXiv*  
1065 *[cs.AI]* (2018).
- 1066 23. Chen, Y. & Chi, Y. Harnessing Structures in Big Data via Guaranteed Low-Rank Matrix  
1067 Estimation: Recent Theory and Fast Algorithms via Convex and Nonconvex Optimization.  
1068 *IEEE Signal Process. Mag.* **35**, 14–31 (2018).
- 1069 24. Chen, Y. & Candès, E. J. The projected power method: An efficient algorithm for joint  
1070 alignment from pairwise differences. *Commun. Pure Appl. Math.* **71**, 1648–1714 (2018).
- 1071 25. Jia, G. *et al.* Estimating heritability and genetic correlations from large health datasets in the  
1072 absence of genetic data. *Nat. Commun.* **10**, 1–11 (2019).
- 1073 26. Tanigawa, Y. *et al.* Components of genetic associations across 2,138 phenotypes in the UK  
1074 Biobank highlight adipocyte biology. *Nat. Commun.* **10**, 4064 (2019).
- 1075 27. Sakaue, S. *et al.* A cross-population atlas of genetic associations for 220 human  
1076 phenotypes. *Nat. Genet.* **53**, 1415–1424 (2021).
- 1077 28. Jia, G. *et al.* Discerning asthma endotypes through comorbidity mapping. *Nat. Commun.*  
1078 **13**, 1–19 (2022).
- 1079 29. Bycroft, C. *et al.* The UK Biobank resource with deep phenotyping and genomic data.  
1080 *Nature* **562**, 203–209 (2018).
- 1081 30. of Us Research Program, A. The ‘All of Us’ Research Program. *N. Engl. J. Med.* **381**, 668–  
1082 676 (2019).
- 1083 31. Ishigaki, K. *et al.* Large-scale genome-wide association study in a Japanese population  
1084 identifies novel susceptibility loci across different diseases. *Nat. Genet.* **52**, 669–679  
1085 (2020).
- 1086 32. Siggaard, T. *et al.* Disease trajectory browser for exploring temporal, population-wide  
1087 disease progression patterns in 7.2 million Danish patients. *Nat. Commun.* **11**, 1–10 (2020).
- 1088 33. Posey, J. E. *et al.* Resolution of Disease Phenotypes Resulting from Multilocus Genomic  
1089 Variation. *N. Engl. J. Med.* **376**, 21–31 (2017).

- 1090 34. Cook, E. K. *et al.* Comorbid and inflammatory characteristics of genetic subtypes of clonal  
1091 hematopoiesis. *Blood Adv* **3**, 2482–2486 (2019).
- 1092 35. Udler, M. S. *et al.* Type 2 diabetes genetic loci informed by multi-trait associations point to  
1093 disease mechanisms and subtypes: A soft clustering analysis. *PLoS Med.* **15**, e1002654  
1094 (2018).
- 1095 36. Wani, B., Aziz, S. A., Ganaie, M. A. & Mir, M. H. Metabolic Syndrome and Breast Cancer  
1096 Risk. *Indian J. Med. Paediatr. Oncol.* **38**, 434–439 (2017).
- 1097 37. Blei, Ng & Jordan. Latent dirichlet allocation. *J. Mach. Learn. Res.* (2003).
- 1098 38. Pritchard, J. K., Stephens, M. & Donnelly, P. Inference of population structure using  
1099 multilocus genotype data. *Genetics* **155**, 945–959 (2000).
- 1100 39. Bishop, C. M. *Pattern Recognition and Machine Learning*. (Springer New York, 2006).
- 1101 40. Teh, Y., Newman, D. & Welling, M. A collapsed variational Bayesian inference algorithm for  
1102 latent Dirichlet allocation. *Adv. Neural Inf. Process. Syst.* **19**, (2006).
- 1103 41. Grau, J., Grosse, I. & Keilwagen, J. PRROC: computing and visualizing precision-recall and  
1104 receiver operating characteristic curves in R. *Bioinformatics* **31**, 2595–2597 (2015).
- 1105 42. Wu, P. *et al.* Mapping ICD-10 and ICD-10-CM Codes to Phecodes: Workflow Development  
1106 and Initial Evaluation. *JMIR Med Inform* **7**, e14325 (2019).
- 1107 43. Suvila, K. *et al.* Early Onset Hypertension Is Associated With Hypertensive End-Organ  
1108 Damage Already by MidLife. *Hypertension* HYPERTENSIONAHA11913069 (2019).
- 1109 44. Wong, B. *et al.* Cardiovascular Disease Risk Associated With Familial  
1110 Hypercholesterolemia: A Systematic Review of the Literature. *Clin. Ther.* **38**, 1696–1709  
1111 (2016).
- 1112 45. Shah, M. S. & Brownlee, M. Molecular and Cellular Mechanisms of Cardiovascular  
1113 Disorders in Diabetes. *Circ. Res.* **118**, 1808–1829 (2016).
- 1114 46. Shah, A. D. *et al.* Type 2 diabetes and incidence of cardiovascular diseases: a cohort study  
1115 in 1.9 million people. *The Lancet Diabetes & Endocrinology* **3**, 105–113 (2015).

- 1116 47. Dabelea, D. & Hamman, R. F. Elevated Cardiometabolic Risk Profile Among Young Adults  
1117 With Diabetes: Need for Action. *Diabetes care* vol. 42 1845–1846 (2019).
- 1118 48. Wong, J. L. & Evans, S. E. Bacterial Pneumonia in Patients with Cancer: Novel Risk  
1119 Factors and Management. *Clin. Chest Med.* **38**, 263–277 (2017).
- 1120 49. Falstie-Jensen, A. M. *et al.* Incidence of hypothyroidism after treatment for breast cancer—  
1121 a Danish matched cohort study. *Breast Cancer Res.* **22**, 1–10 (2020).
- 1122 50. Loh, P.-R., Kichaev, G., Gazal, S., Schoech, A. P. & Price, A. L. Mixed-model association  
1123 for biobank-scale datasets. *Nat. Genet.* **50**, 906–908 (2018).
- 1124 51. Loh, P.-R. *et al.* Efficient Bayesian mixed-model analysis increases association power in  
1125 large cohorts. *Nat. Genet.* **47**, 284–290 (2015).
- 1126 52. Jiang, X., Holmes, C. & McVean, G. The impact of age on genetic risk for common  
1127 diseases. *PLoS Genet.* **17**, e1009723 (2021).
- 1128 53. Weir, B. S. & Cockerham, C. C. ESTIMATING F-STATISTICS FOR THE ANALYSIS OF  
1129 POPULATION STRUCTURE. *Evolution* **38**, 1358–1370 (1984).
- 1130 54. Bhatia, G., Patterson, N., Sankararaman, S. & Price, A. L. Estimating and interpreting FST:  
1131 the impact of rare variants. *Genome Res.* **23**, 1514–1521 (2013).
- 1132 55. Scott, L. J. *et al.* A genome-wide association study of type 2 diabetes in Finns detects  
1133 multiple susceptibility variants. *Science* **316**, 1341–1345 (2007).
- 1134 56. Maller, J. B. *et al.* Bayesian refinement of association signals for 14 loci in 3 common  
1135 diseases. *Nat. Genet.* **44**, 1294–1301 (2012).
- 1136 57. Cheng, M., An, S. & Li, J. CDKN2B-AS may indirectly regulate coronary artery disease-  
1137 associated genes via targeting miR-92a. *Gene* **629**, 101–107 (2017).
- 1138 58. Scott, R. A. *et al.* An Expanded Genome-Wide Association Study of Type 2 Diabetes in  
1139 Europeans. *Diabetes* **66**, 2888–2902 (2017).
- 1140 59. Aragam, K. G. *et al.* Discovery and systematic characterization of risk variants and genes  
1141 for coronary artery disease in over a million participants. *bioRxiv* (2021)

- 1142 doi:10.1101/2021.05.24.21257377.
- 1143 60. Indra, A. K. Epidermal TSLP: a trigger factor for pathogenesis of atopic dermatitis. *Expert*  
1144 *Rev. Proteomics* **10**, 309–311 (2013).
- 1145 61. Kanai, M. *et al.* Genetic analysis of quantitative traits in the Japanese population links cell  
1146 types to complex human diseases. *Nat. Genet.* **50**, 390–400 (2018).
- 1147 62. Oluwafemi, O. O. *et al.* Genome-Wide Association Studies of Conotruncal Heart Defects  
1148 with Normally Related Great Vessels in the United States. *Genes* **12**, (2021).
- 1149 63. Blei, D. M. & Lafferty, J. D. A correlated topic model of Science. *Ann. Appl. Stat.* **1**, 17–35  
1150 (2007).
- 1151 64. Zaitlen, N. *et al.* Informed conditioning on clinical covariates increases power in case-  
1152 control association studies. *PLoS Genet.* **8**, e1003032 (2012).
- 1153 65. Sun, B. B. *et al.* Genetic regulation of the human plasma proteome in 54,306 UK Biobank  
1154 participants. *bioRxiv* 2022.06.17.496443 (2022) doi:10.1101/2022.06.17.496443.
- 1155 66. Mostafavi, H. *et al.* Variable prediction accuracy of polygenic scores within an ancestry  
1156 group. *Elife* **9**, e48376 (2020).
- 1157 67. Dumitrescu, L. *et al.* Evidence for age as a modifier of genetic associations for lipid levels.  
1158 *Ann. Hum. Genet.* **75**, 589–597 (2011).
- 1159 68. Chatterjee, N., Shi, J. & García-Closas, M. Developing and evaluating polygenic risk  
1160 prediction models for stratified disease prevention. *Nat. Rev. Genet.* **17**, 392–406 (2016).
- 1161 69. Lin, J. *et al.* Integration of biomarker polygenic risk score improves prediction of coronary  
1162 heart disease in UK Biobank and FinnGen. *bioRxiv* (2022)  
1163 doi:10.1101/2022.08.22.22279057.
- 1164 70. Ghorbani, B., Javadi, H. & Montanari, A. An Instability in Variational Inference for Topic  
1165 Models. in *Proceedings of the 36th International Conference on Machine Learning* (eds.  
1166 Chaudhuri, K. & Salakhutdinov, R.) vol. 97 2221–2231 (PMLR, 09--15 Jun 2019).
- 1167 71. Chang, C. C. *et al.* Second-generation PLINK: rising to the challenge of larger and richer



1168 datasets. *Gigascience* **4**, 7 (2015).

1169 72. International HapMap 3 Consortium *et al.* Integrating common and rare genetic variation in  
1170 diverse human populations. *Nature* **467**, 52–58 (2010).

1171
